# Supplementary material
Source: publisher figshare collection journal article supplement (https://acs.figshare.com/ndownloader/files/17766068)
Supplement: Supplementary file 1 [file 17766068]

# New Class of Supramolecular Bowl-Shaped Columnar Mesogens Derived from Thiocalix[4]arene Exhibiting Gelation and Organic Light-Emitting Diodes Applications

---

Vinay S.Sharma<sup>a\*</sup>, Anuj S.Sharma<sup>b</sup>, Akshara P.Shah<sup>c</sup>, Priyanka A.Shah<sup>b</sup>, Pranav S.Shrivastav<sup>b</sup>, Mohd Athar<sup>d</sup>

<sup>a\*</sup>: Department of Chemistry, Faculty of Basic and Applied Sciences, Madhav University, Abu road, Sirohi, Rajasthan.

<sup>b</sup>: Department of Chemistry, School of Science, Gujarat University, Ahmedabad, Gujarat.

<sup>c</sup>: Department of Chemistry, Mumbai University, Santacruz, Mumbai.

<sup>d</sup>: Department of Chemistry, Central University of Gujarat, Gandhinagar, India.

Email address of corresponding author<sup>a</sup>: [vinaysharma3836@gmail.com](mailto:vinaysharma3836@gmail.com)

---

## Contents:

|                                                              |       |
|--------------------------------------------------------------|-------|
| 1. TGA, DSC data.....                                        | 2     |
| 2. POM data.....                                             | 3     |
| 3. XRD data.....                                             | 4     |
| 4. UV, fluorescence data.....                                | 5     |
| 5. CV data.....                                              | 6-7   |
| 6. Optimized structures, HOMO-LUMO.....                      | 8-11  |
| 7. Gelation data.....                                        | 11-16 |
| 8. Electroluminescence data.....                             | 17-18 |
| 8. <sup>1</sup> H NMR, <sup>13</sup> C NMR and ESI-Mass..... | 19-42 |
| 9. References.....                                           | 43    |

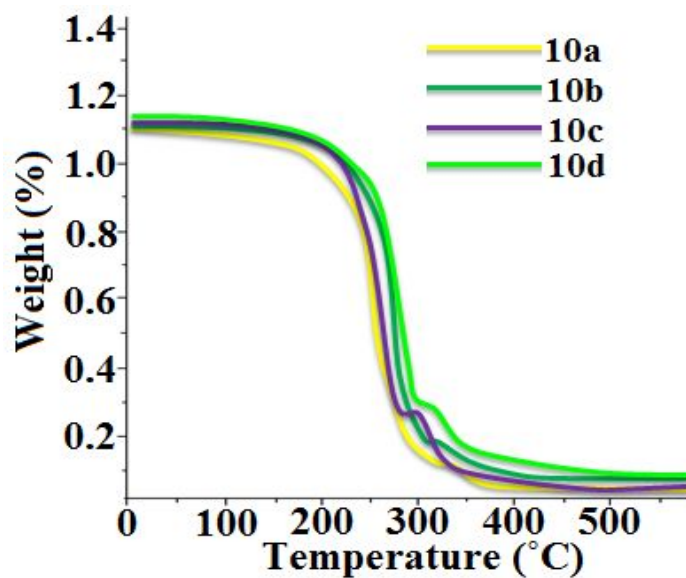

**Figure S1.** TGA curves of the compounds **10a-10d** carried out at a rate of 10°C/min.

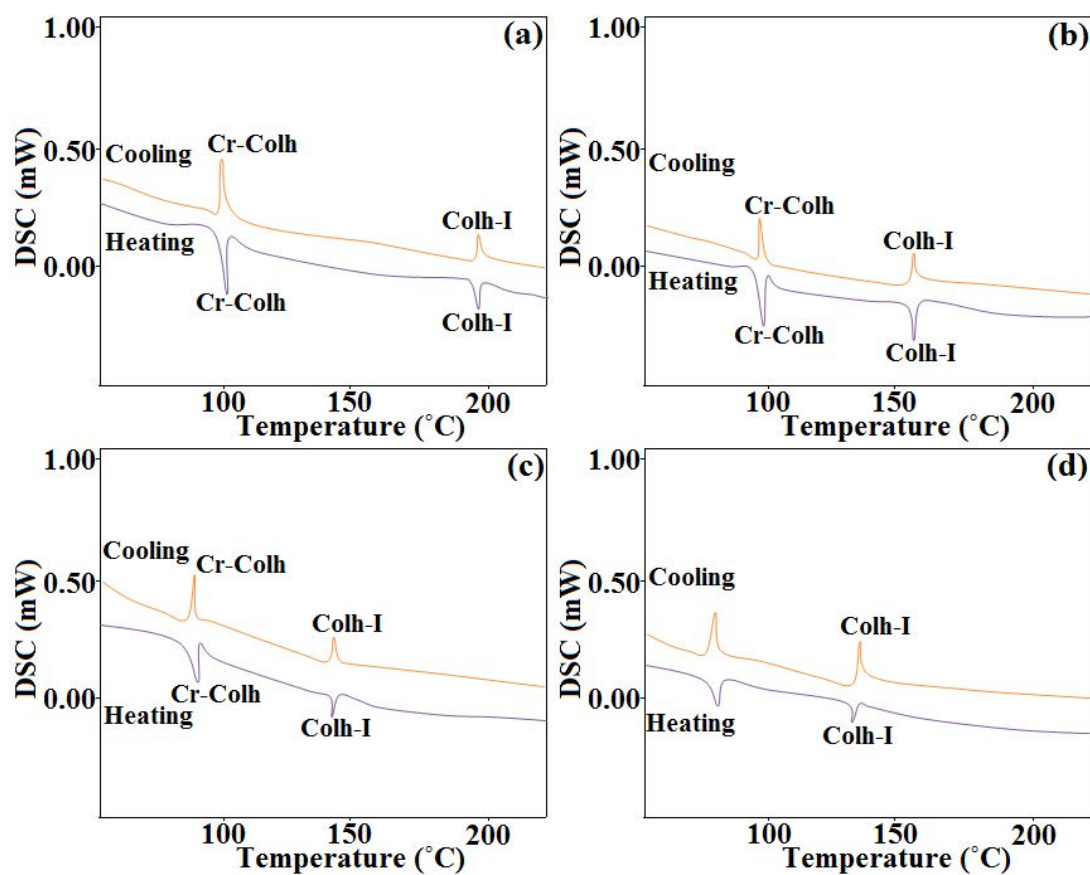

**Figure S2.** The DSC traces of compounds **10a** (a), **10b** (b), **10c** (c) and **10d** (d) on first heating and cooling (scan rate 10°C/min).

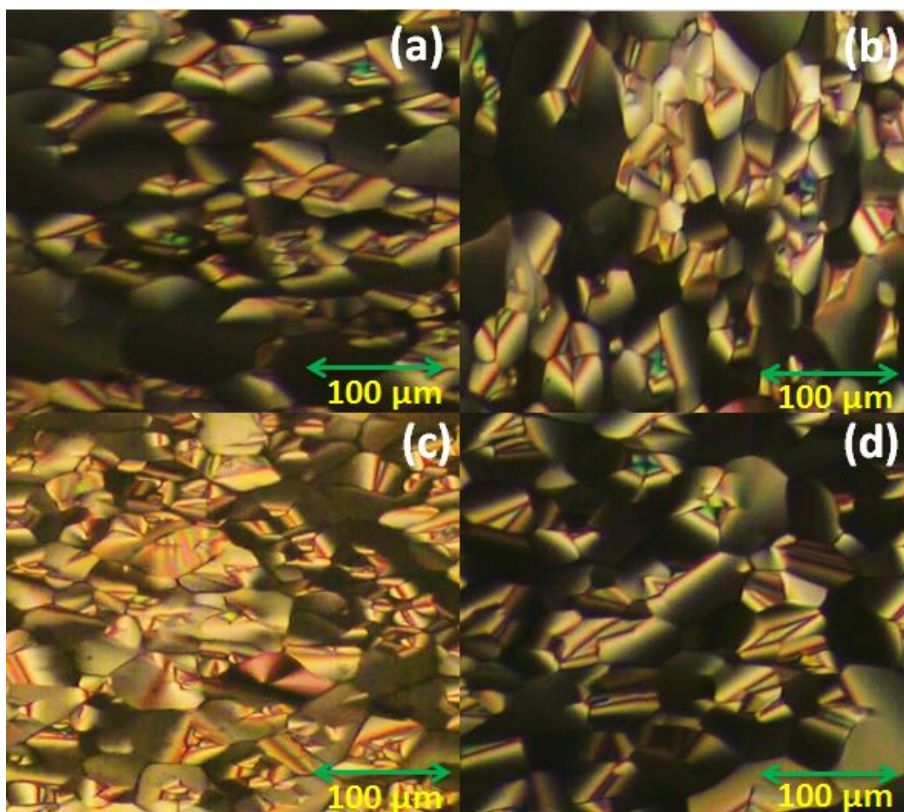

**Figure S3.** POM texture image of compound **10a** at 102.8 °C (a) compound **10b** at 94.8 °C (b) compound **10c** at 75.2 °C (c) and compound **10d** at 61.6 °C (d) on heating condition from solid crystalline state as seen under cross polarizers.

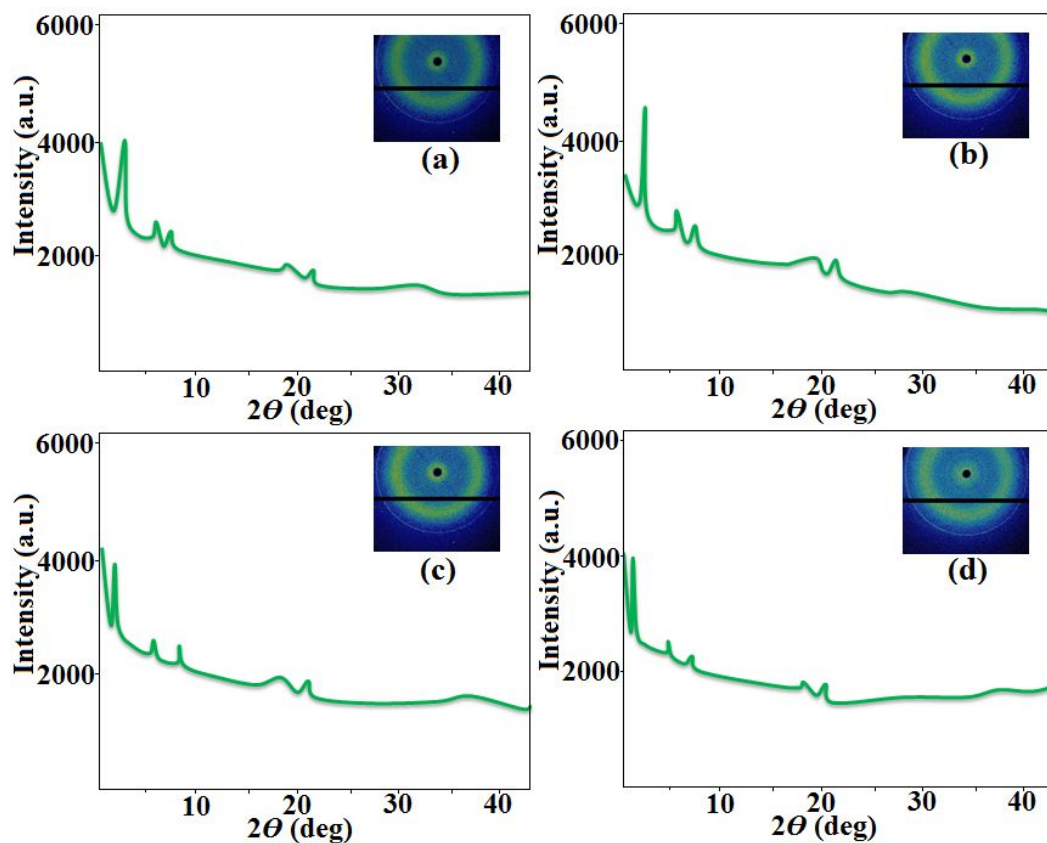

**Figure S4.** XRD profiles depicting the intensity against the  $2\theta$  obtained for the Col<sub>h</sub> phase of compound **10a** at 104.0 °C (a); Col<sub>h</sub> phase of compound **10b** at 94.0 °C (b); Col<sub>h</sub> phase of compound **10c** at 78.0 °C (c); Col<sub>h</sub> phase of compound **10d** at 66.0 °C (d) on cooling from isotropic temperature; the insert shows the image pattern obtained.

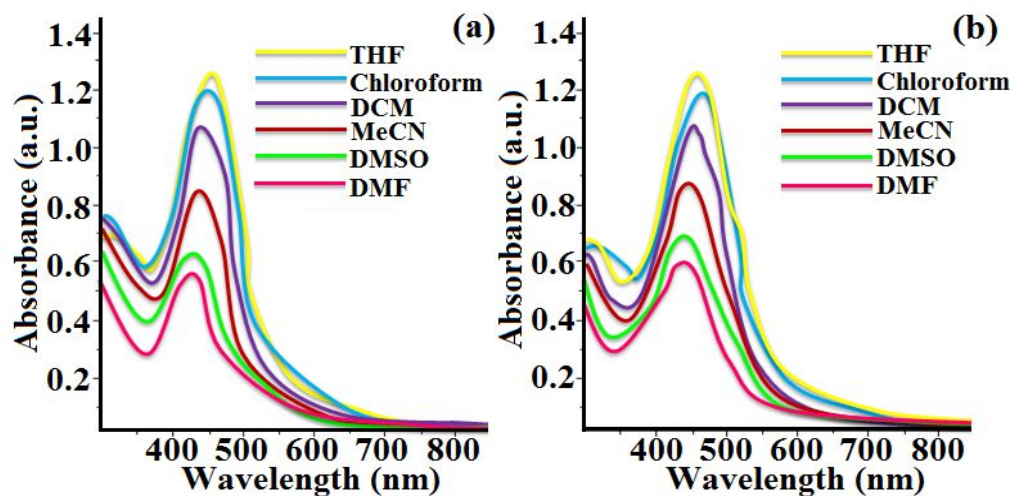

**Figure S5.** Absorption spectra of compound **10a** (a); compound **10d** (b) in different solvents (0.05  $\mu\text{M}$ ).

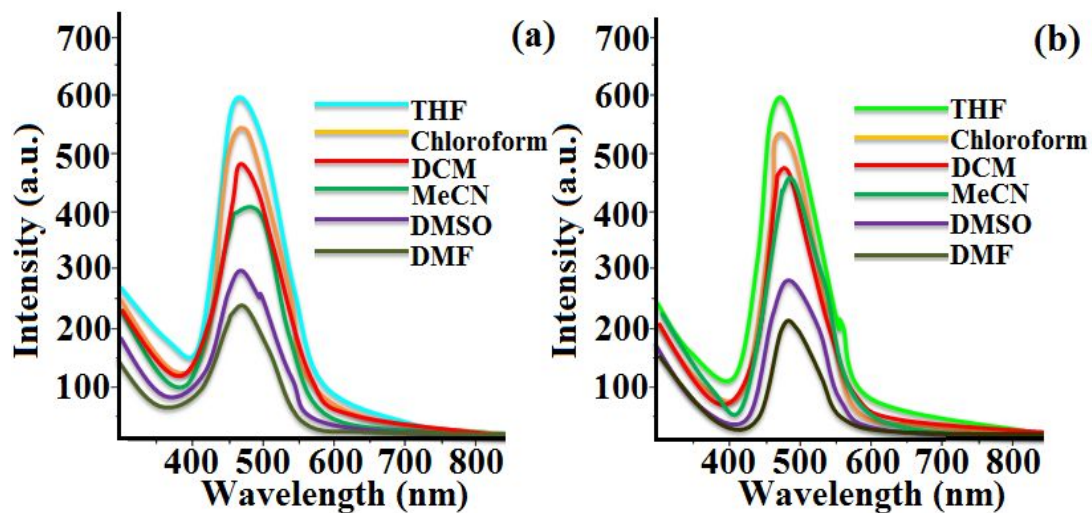

**Figure S6.** Fluorescence spectra of compound **10a** (a); compound **10d** (b) in different solvents (0.05  $\mu\text{M}$ ).

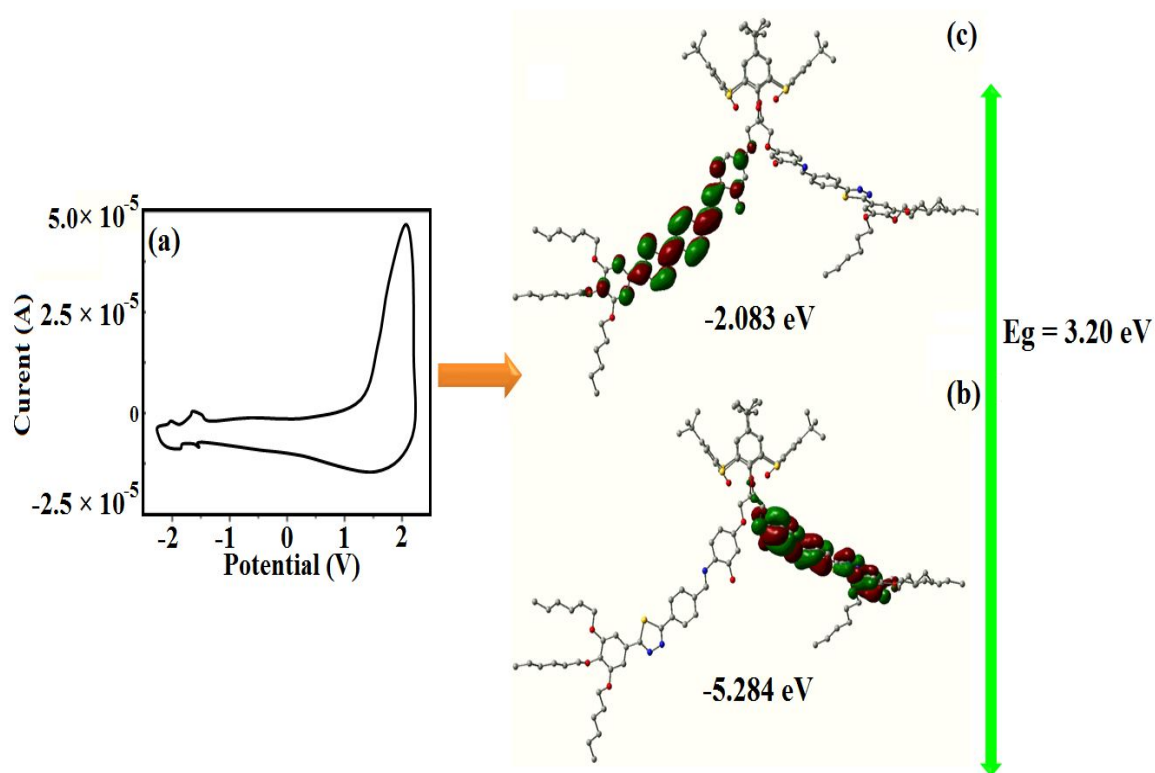

**Figure S7.** (a) Cyclic voltammogram of compound **10b** in anhydrous THF solution of TBAP (0.1 M) at a scanning rate of 0.5 mV/s. (b,c) The HOMO and LUMO levels of compound **10b** obtained from DFT calculation at the B3LYP/3-21G\* level using Gaussian 09. Hydrogen atoms were omitted for clarity.

**Table S<sub>1</sub>.** Electrochemical properties of compounds **10a-10d**

| Comp.      | E <sub>oxd</sub> | E <sub>red</sub> | E <sub>HOMO</sub> | E <sub>LUMO</sub> | ΔE <sub>g</sub> , CV |
|------------|------------------|------------------|-------------------|-------------------|----------------------|
| <b>10a</b> | 1.59             | -1.52            | -5.82             | -2.71             | 3.11                 |
| <b>10b</b> | 1.57             | -1.50            | -5.80             | -2.72             | 3.08                 |
| <b>10c</b> | 1.58             | -1.49            | -5.81             | -2.74             | 3.07                 |
| <b>10d</b> | 1.61             | -1.54            | -5.85             | -2.69             | 3.16                 |

**Experimental conditions:** Ag/AgNO<sub>3</sub> as a reference electrode, platinum wire as counter electrode, glassy carbon as working electrode, tetrabutylammonium perchlorate (0.1 M) as supporting electrolyte, room temperature



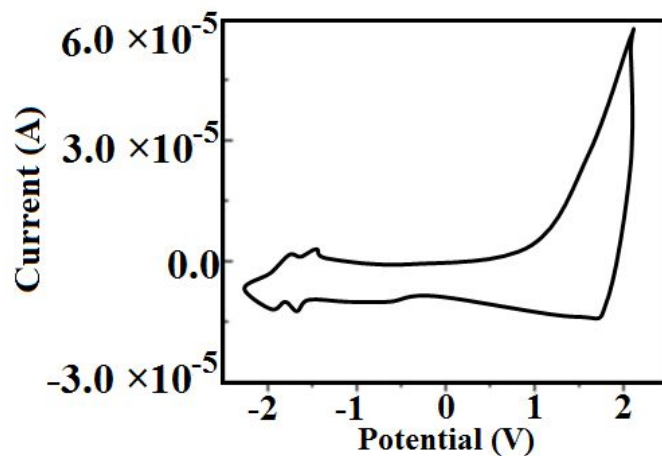

**Figure S8.** Cyclic voltammogram of compound **10c** in anhydrous THF solution of TBAP (0.1 M) at a scanning rate of 0.5 mV/s.

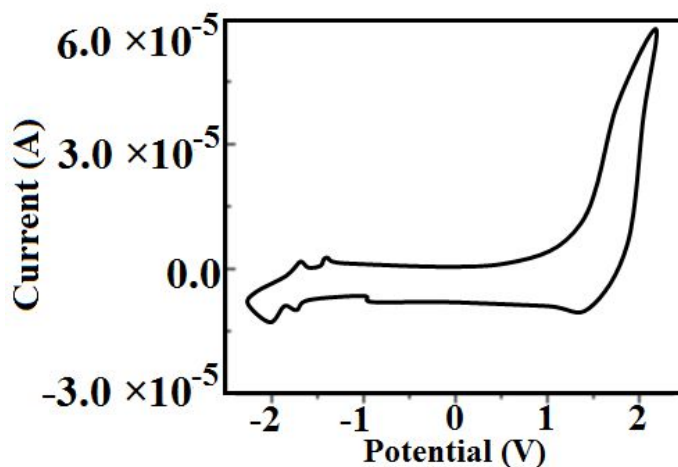

**Figure S9.** Cyclic voltammogram of compound **10d** in anhydrous THF solution of TBAP (0.1 M) at a scanning rate of 0.5 mV/s.

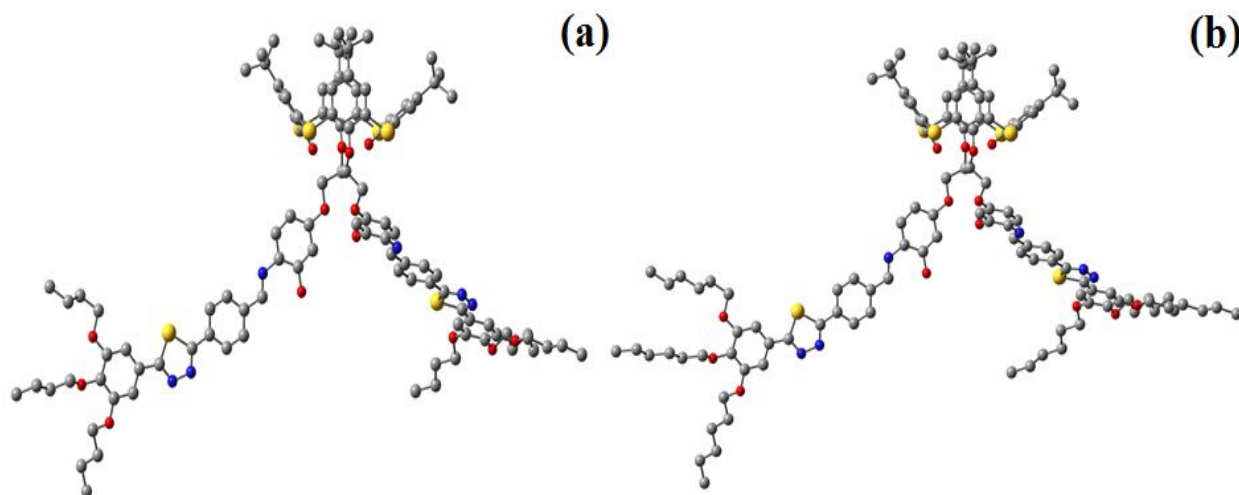

**Figure S10.** Optimized geometries of 1,3,4-thiadiazole based thiacalix[4]arene derivatives (a) **10a** (cone conformation); (b) **10b** (cone conformation) at B3LYP/3-21G level. Hydrogens were omitted for clarity.

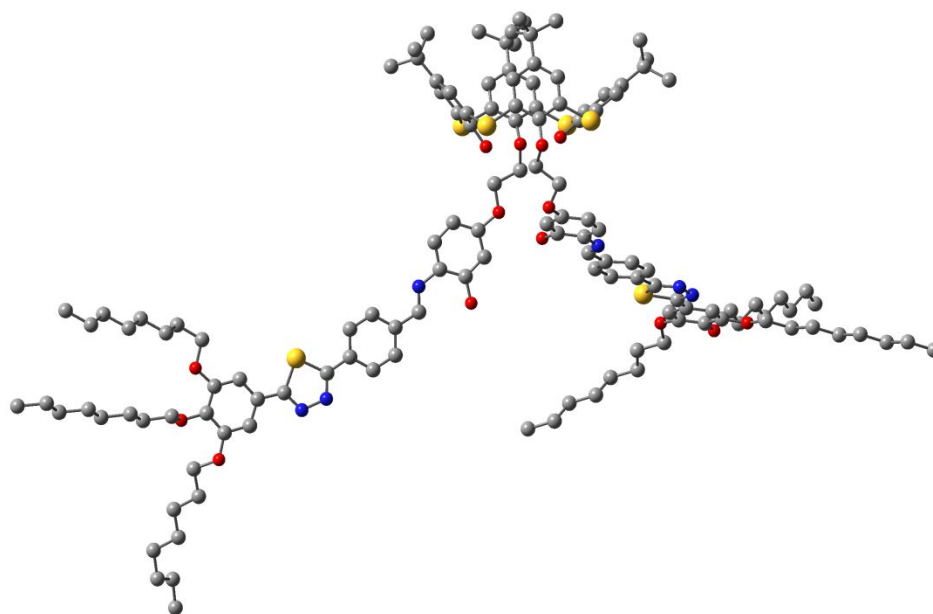

**Figure S11.** Optimized geometries of 1,3,4-thiadiazole based thiacalix[4]arene derivatives **10c** (cone conformation) at B3LYP/3-21G level. Hydrogens were omitted for clarity.



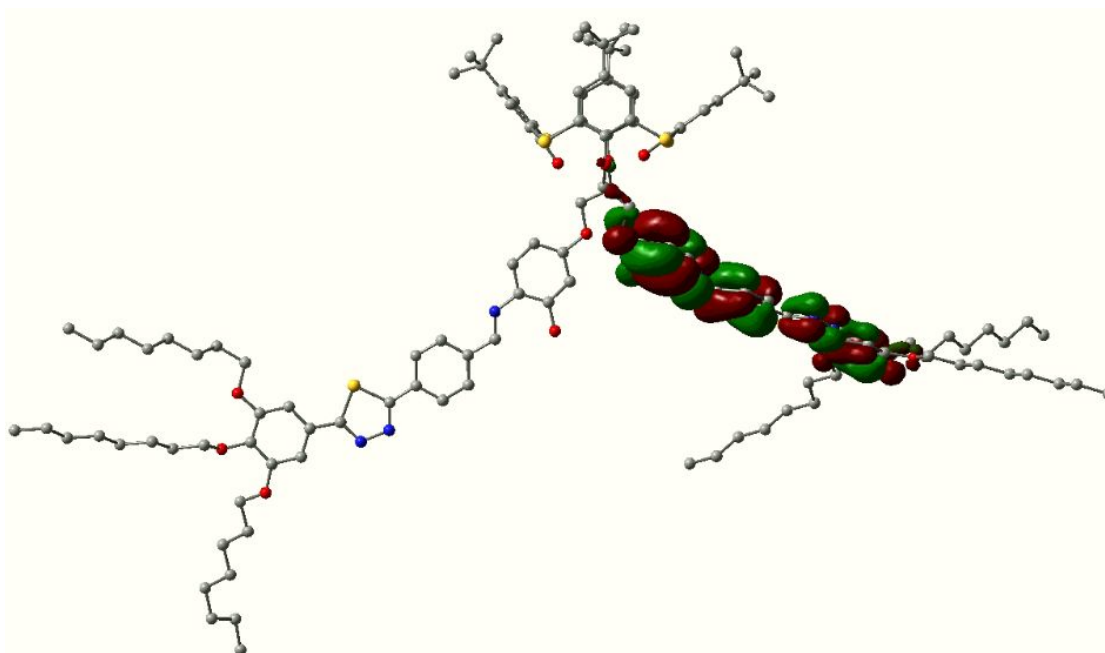

**Figure S12.** The HOMO energy levels of compound **10c** obtained from DFT calculation at the B3LYP/3-21G\* level. Hydrogen atoms were omitted for clarity.

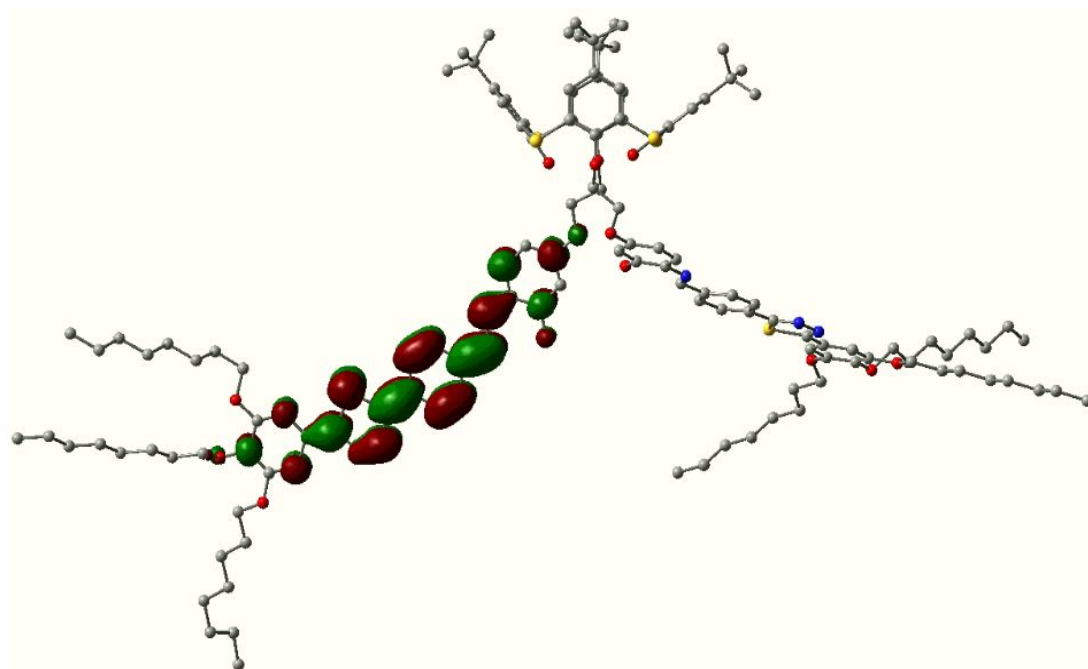

**Figure S13.** The LUMO energy levels of compound **10c** obtained from DFT calculation at the B3LYP/3-21G\* level. Hydrogen atoms were omitted for clarity.

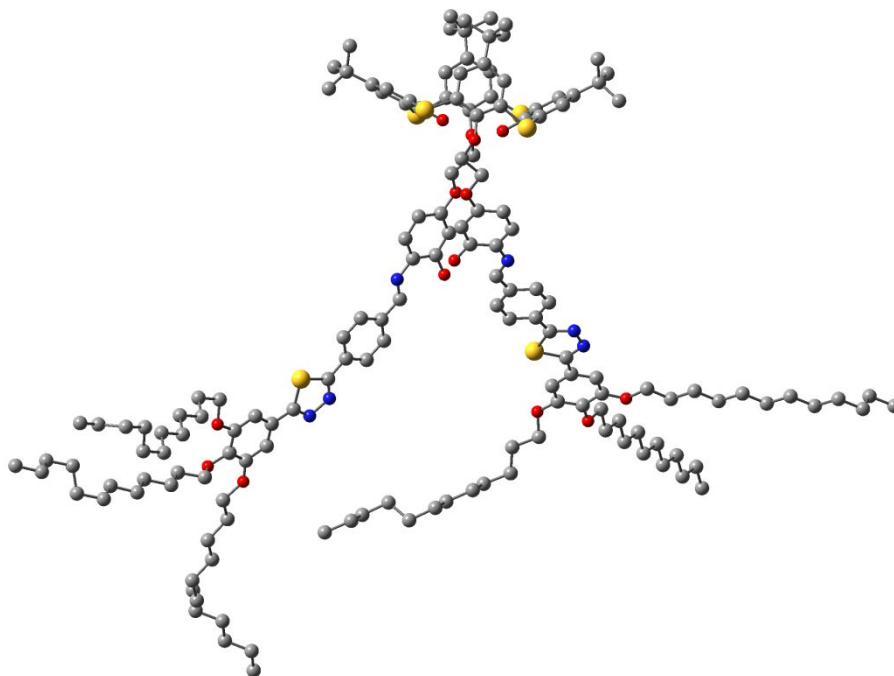

**Figure S14.** Optimized geometries of 1,3,4-thiadiazole based thiacalix[4]arene derivatives **10d** (cone conformation) at B3LYP/3-21G level. Hydrogens were omitted for clarity.

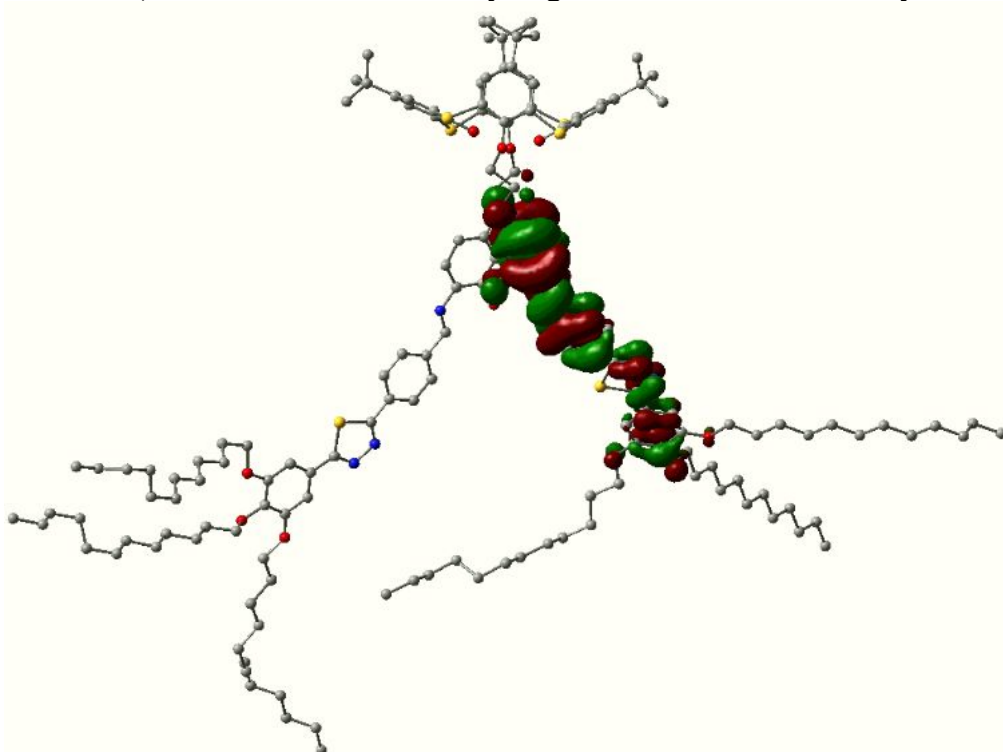

**Figure S15.** The HOMO energy levels of compound **10d** obtained from DFT calculation at the B3LYP/3-21G\* level. Hydrogen atoms were omitted for clarity.

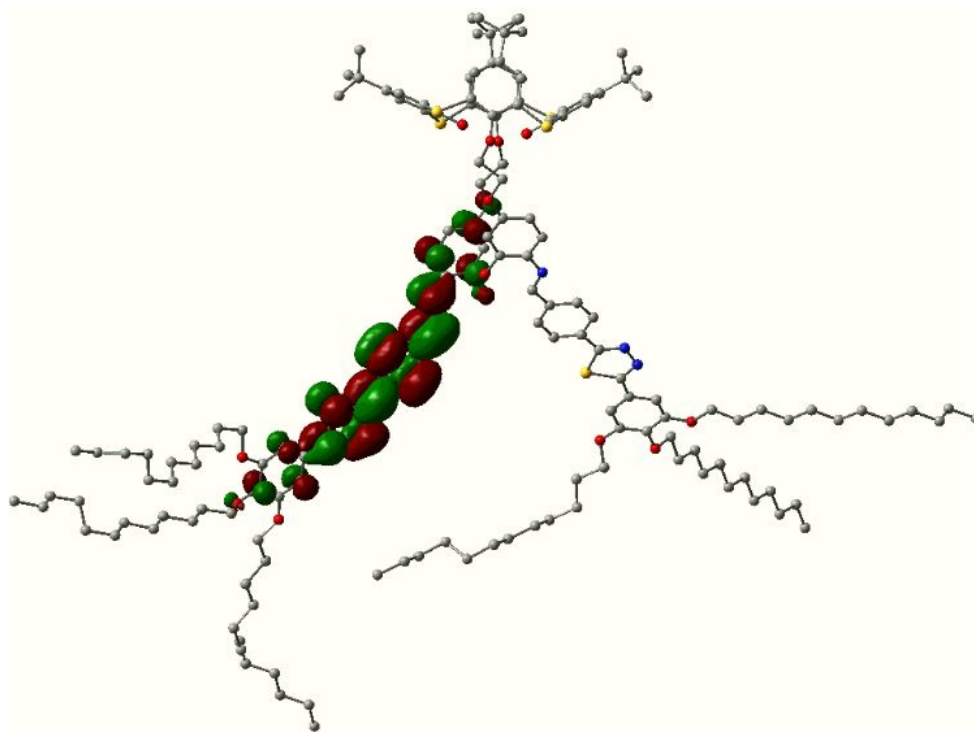

**Figure S16.** The LUMO energy levels of compound **10d** obtained from DFT calculation at the B3LYP/3-21G\* level. Hydrogen atoms were omitted for clarity.

**Table S<sub>2</sub>.** Gelation behaviour of compound **10c** and **10d**

| Sr.No. | Solvent  | Comp.10c   |               | Comp.10d   |               |
|--------|----------|------------|---------------|------------|---------------|
|        |          | Properties | CGC<br>(wt %) | Properties | CGC<br>(wt %) |
| 1      | Decane   | G(O)       | 1.6 wt %      | G(O)       | 1.9 wt %      |
| 2      | Dodecane | G(O)       | 1.1 wt %      | G(O)       | 1.5 wt %      |
| 3      | Toluene  | S          | -             | S          | -             |
| 4      | Benzene  | S          | -             | S          | -             |
| 5      | DCM      | S          | -             | S          | -             |

|    |            |   |   |   |   |
|----|------------|---|---|---|---|
| 6  | THF        | S | - | S | - |
| 7  | Chloroform | S | - | S | - |
| 8  | Ethanol    | P | - | P | - |
| 9  | Butanol    | P | - | P | - |
| 10 | Methanol   | P | - | P | - |

G = stable gel; P = precipitate; O = opaque; S = the critical gelation concentration (wt %) is the minimum concentration necessary for gelation.

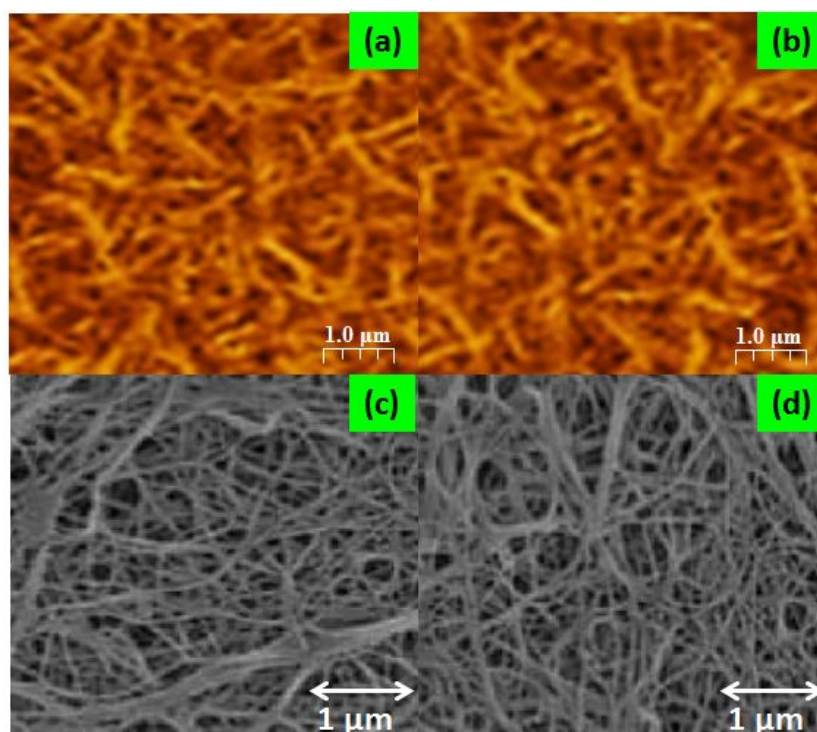

**Figure S17.** AFM and SEM images obtained for compound **10c** (a,c); compound **10d** (b,d) at 1mM in the dodecane solution (scale bar is 1μm).

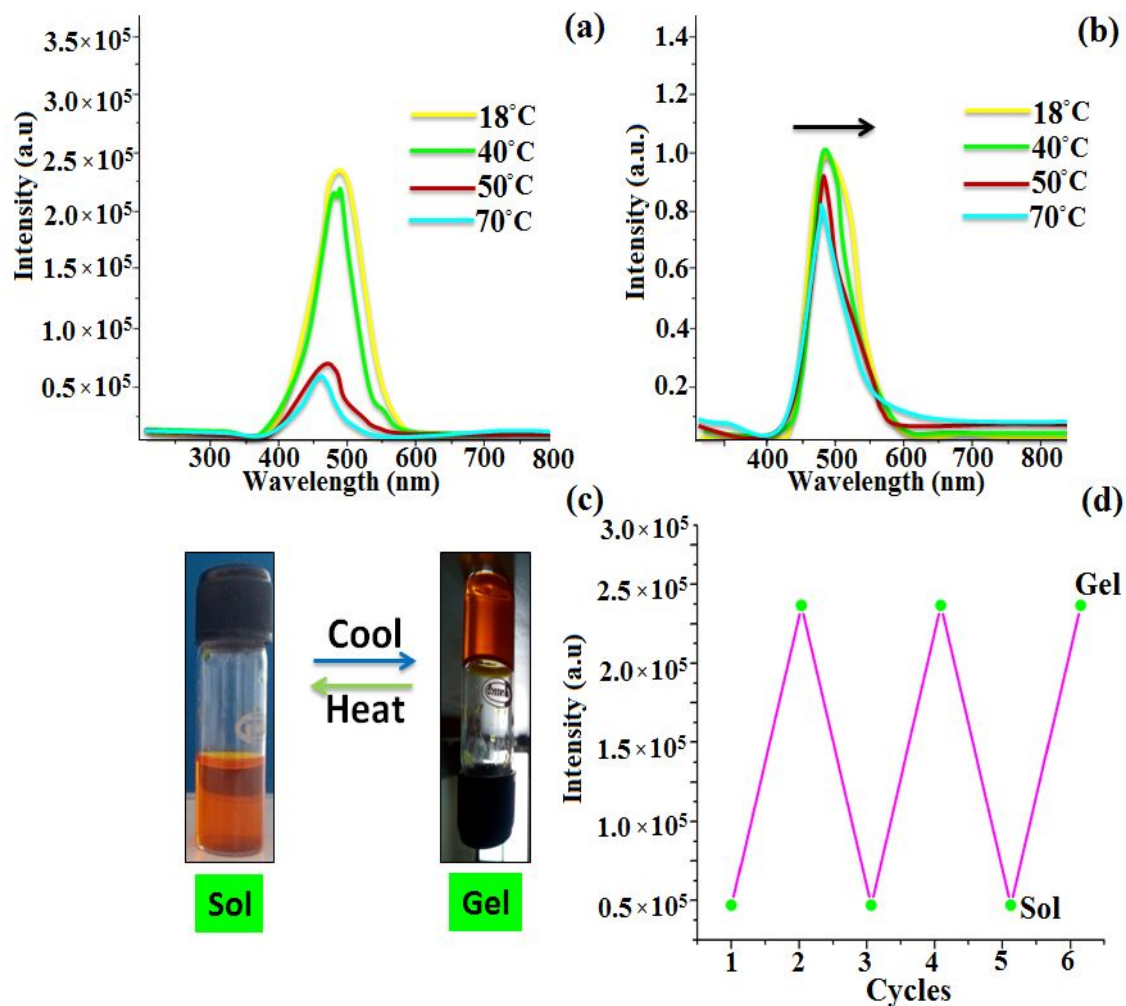

**Figure S18.** Emission spectra of compound **10c** showing an increase in the emission intensity on decreasing temperature due to gelation (a); normalized emission spectra showing a red shift on gelation (b); image of formation of gel from solution (c); reproducible reversibility of emission intensity in solution to gel interconversion (d).

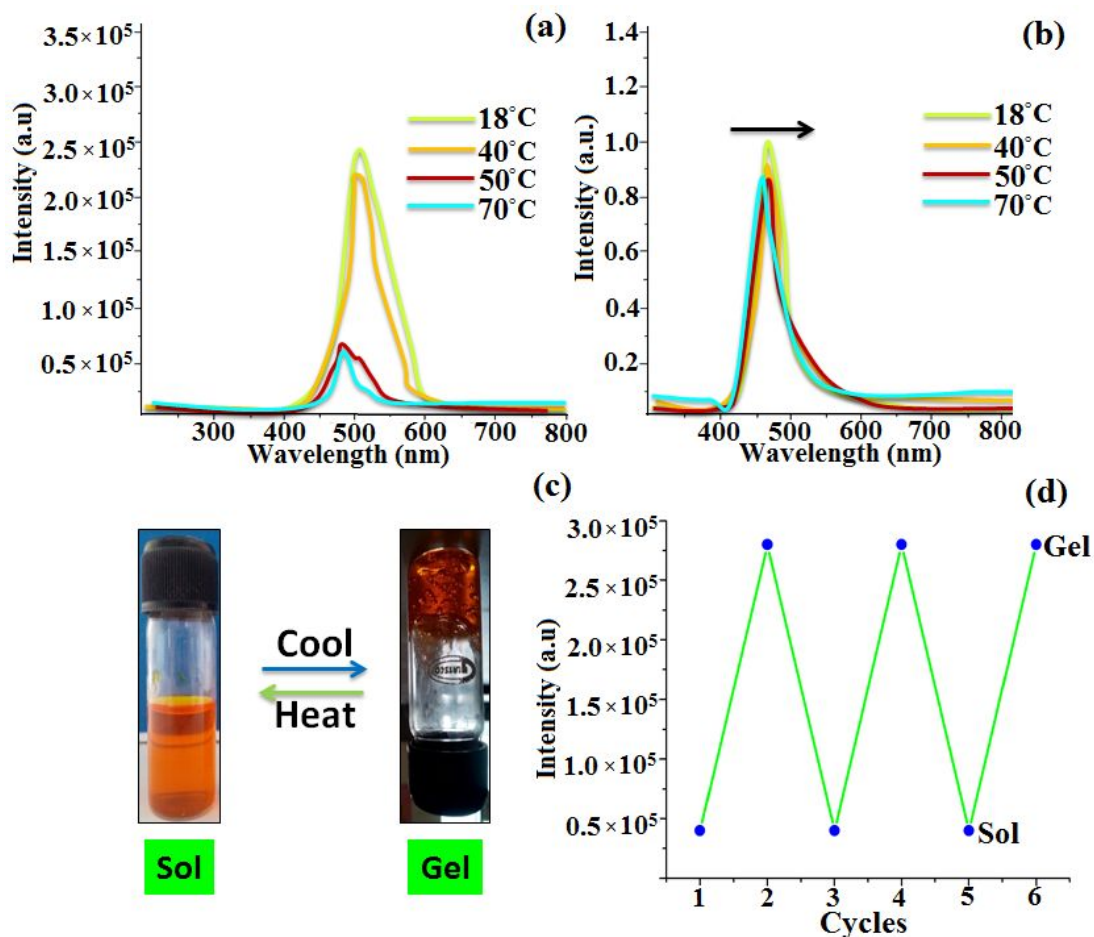

**Figure S19.** Emission spectra of compound **10d** showing an increase in the emission intensity on decreasing temperature due to gelation (a); normalized emission spectra showing a red shift on gelation (b); image of formation of gel from solution (c); reproducible reversibility of emission intensity in solution to gel interconversion (d).

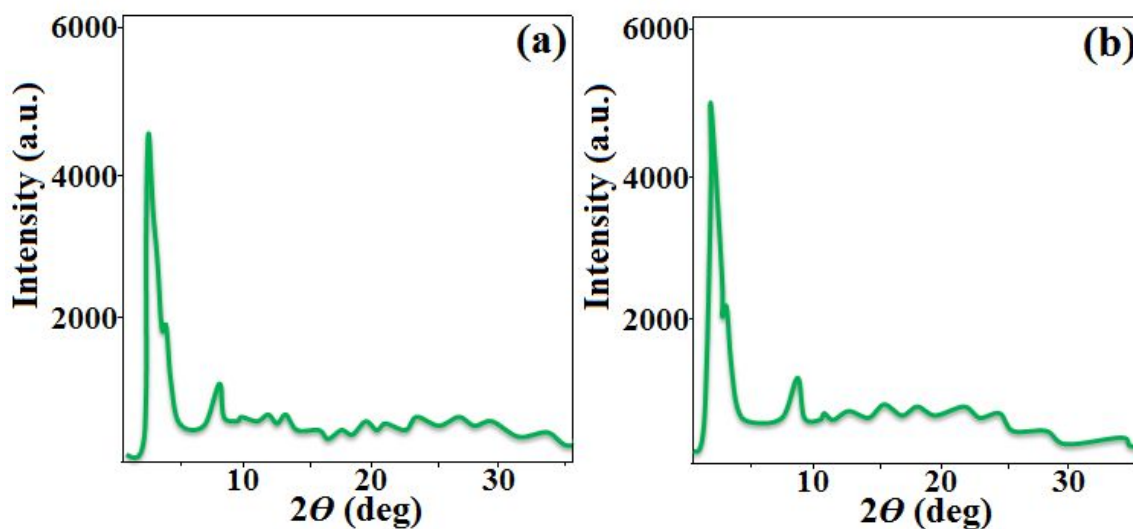

**Figure S20.** XRD profile depicting the intensity against the  $2\theta$  obtained for the Col<sub>r</sub> phase of compounds **10c** (a); compound **10d** (b) in xerogels state.

**Table S<sub>3</sub>.** Results of (hkl) indexation of XRD profiles of the compound **10c** in xerogel state at room temperature.

| Compound<br>(D/Å) | Phase<br>(T/°C) | dobs (Å) | Miller indices | Lattice<br>Parameters<br>(Å) |
|-------------------|-----------------|----------|----------------|------------------------------|
| <b>10c</b>        | Colr<br>(RT)    | 32.76    | 200            |                              |
|                   |                 | 20.26    | 110            |                              |
|                   |                 | 10.38    | 340            | a = 65.22                    |
|                   |                 | 7.05     | 240            | b = 28.97                    |
|                   |                 | 4.49     | 440            |                              |
|                   |                 | 3.77     | 520            |                              |
|                   |                 | 3.18     | 630            |                              |

**Table S<sub>4</sub>.** Results of (hkl) indexation of XRD profiles of the compound **10d** in xerogel state at room temperature.

| Compound<br>(D/Å) | Phase<br>(T/°C) | dobs (Å) | Miller indices | Lattice<br>Parameters<br>(Å) |
|-------------------|-----------------|----------|----------------|------------------------------|
|                   |                 | 34.06    | 200            |                              |
|                   |                 | 20.18    | 110            |                              |
|                   |                 | 10.38    | 320            | a = 63.72                    |



|            |              |      |     |           |
|------------|--------------|------|-----|-----------|
| <b>10d</b> | Colr<br>(RT) | 7.05 | 240 | b = 28.85 |
|            |              | 4.69 | 430 |           |
|            |              | 3.77 | 540 |           |
|            |              | 3.18 | 640 |           |

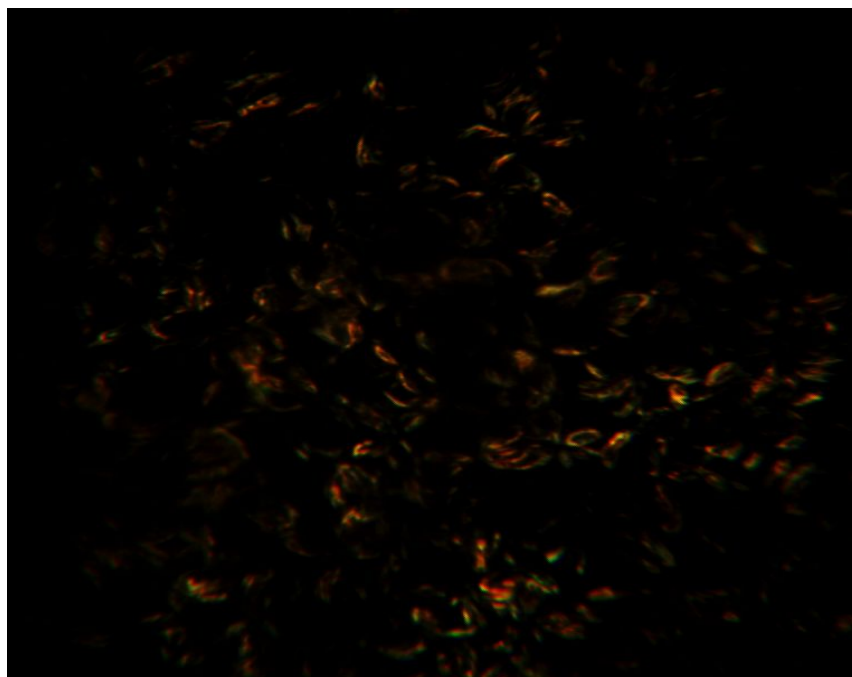

**Figure S21.** POM image of the xerogel showing a birefringent texture of comp.10C.

**Table S5.** Electroluminescent performance data of OLEDs<sup>a</sup>

| Doping concentration (wt.%) | V <sub>onset</sub> <sup>b</sup> (V) | $\eta_p$ <sup>c</sup> (lmW <sup>-1</sup> ) | $\eta_c$ <sup>d</sup> (cdA <sup>-1</sup> ) | EQE <sup>e</sup> (%) | CIE (x,y) <sup>f</sup> | L <sub>max</sub> <sup>g</sup> (cd/m <sup>2</sup> ) | $\lambda_{em}$ <sup>h</sup> (nm) |
|-----------------------------|-------------------------------------|--------------------------------------------|--------------------------------------------|----------------------|------------------------|----------------------------------------------------|----------------------------------|
| 1                           | 6.2                                 | 0.2                                        | 0.6                                        | 0.8                  | (0.24, 0.33)           | 438                                                | 496                              |
| 2                           | 6.7                                 | 0.1                                        | 0.6                                        | 0.6                  | (0.24, 0.33)           | 407                                                | 494                              |
| 5                           | 7.2                                 | 0.2                                        | 0.3                                        | 0.6                  | (0.24, 0.33)           | 353                                                | 496                              |
| 6                           | 6.9                                 | 0.2                                        | 0.5                                        | 0.3                  | (0.24, 0.32)           | 314                                                | 482                              |
| Neat                        | 7.4                                 | 0.2                                        | 0.6                                        | 0.4                  | (0.24, 0.31)           | 286                                                | 484                              |

<sup>a</sup>: Device configuration ITO/PEDOT/emissive layer or doped with CBP/TPBi/LiF/Al, <sup>b</sup>V<sub>onset</sub>: turn-on voltage at luminance of 100 cd/m<sup>2</sup>. Power efficiency ( $\eta_p$ ), current efficiency ( $\eta_c$ ). EQE<sup>e</sup>: external quantum efficiency, CIE (x,y)<sup>f</sup>: Colour coordinates, L<sub>max</sub><sup>g</sup>: maximum luminance of the device,  $\lambda_{em}$ <sup>h</sup>: emission maximum wavelength.

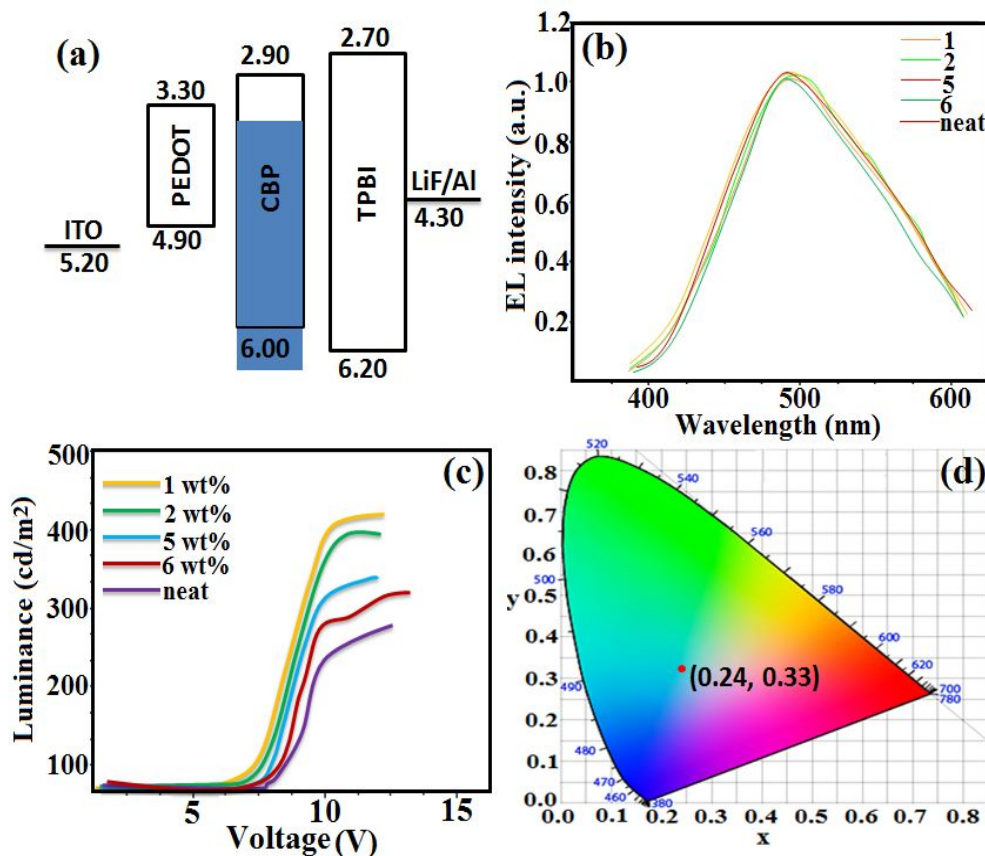

**Figure S22.** (a) Energy-level diagram of the compound **10c** used for the fabrication of (CBP) host OLED device configuration as ITO/PEDOT/emissive layer/TPBi/LiF/Al, (b) EL spectra of OLED devices with various doping concentrations and neat film of compound **10c**, (c) luminance vs voltage plots of the solution proceed OLED device at different doping concentrations and (d) CIE chromatogram of dye doped compound **10c** (1 wt.%) of the device.

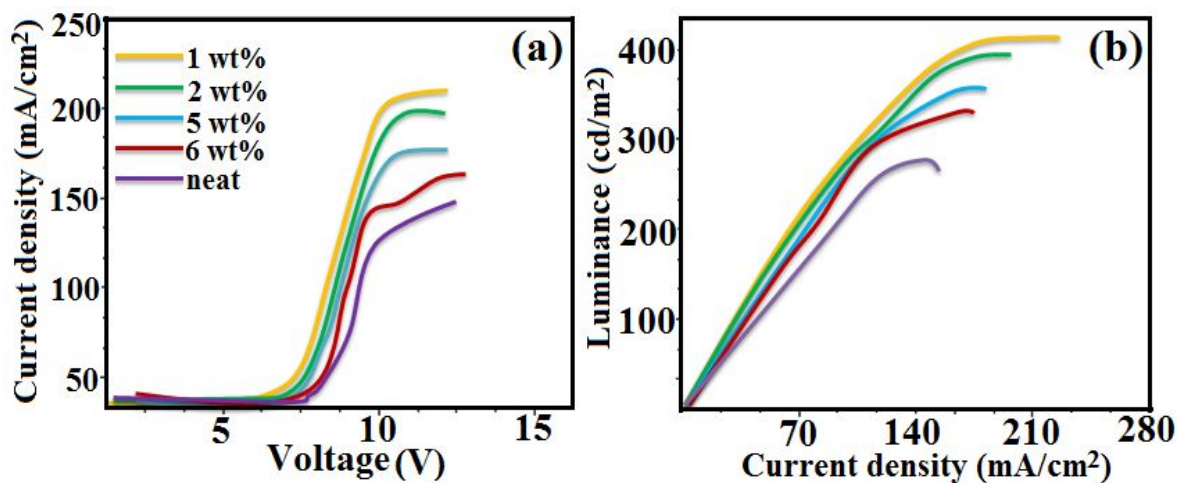

**Figure S23.** (a) Current density vs voltage, (b) luminance vs current density of OLED devices at different doping concentrations of compound **10c**.

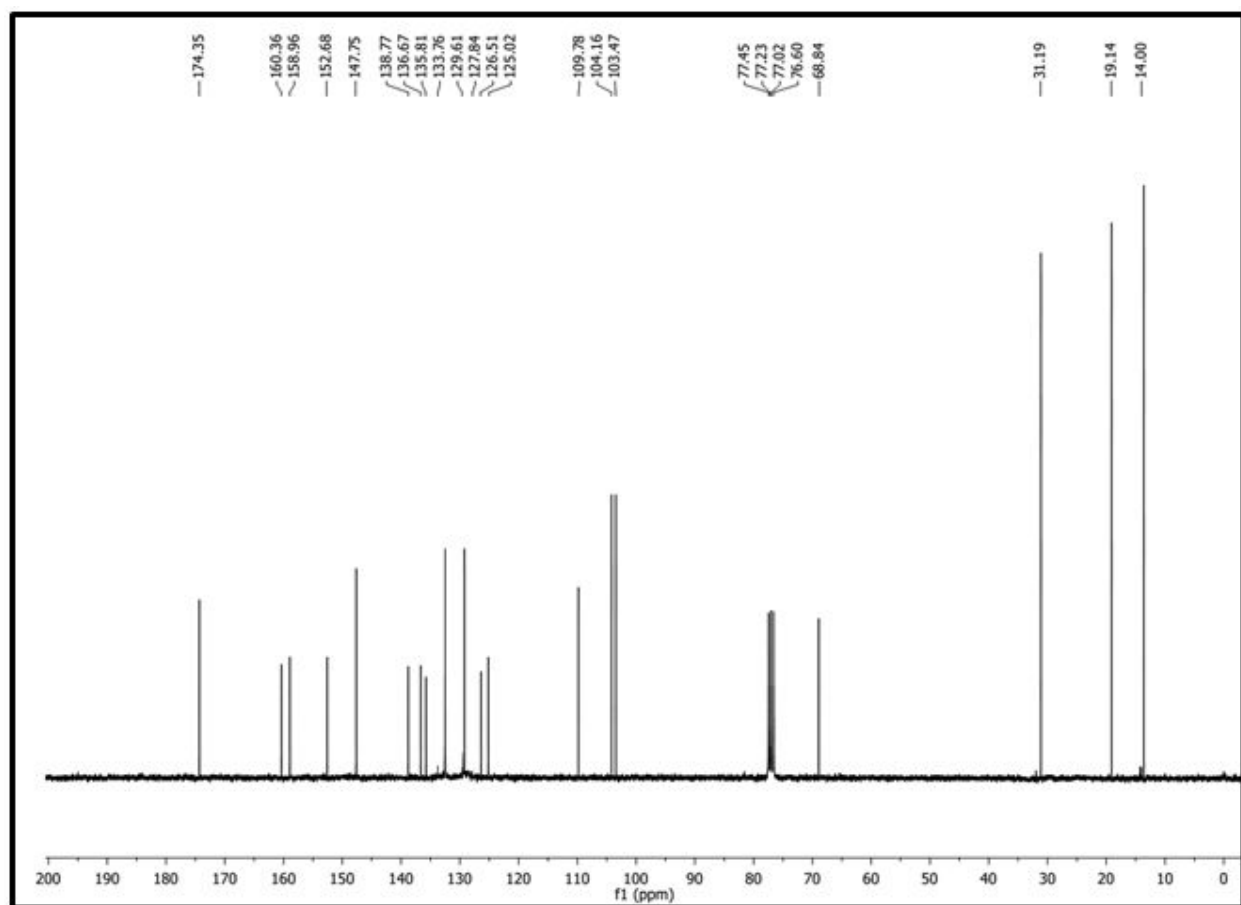

Figure S24.  $^{13}\text{C}$  NMR of compound **8a**

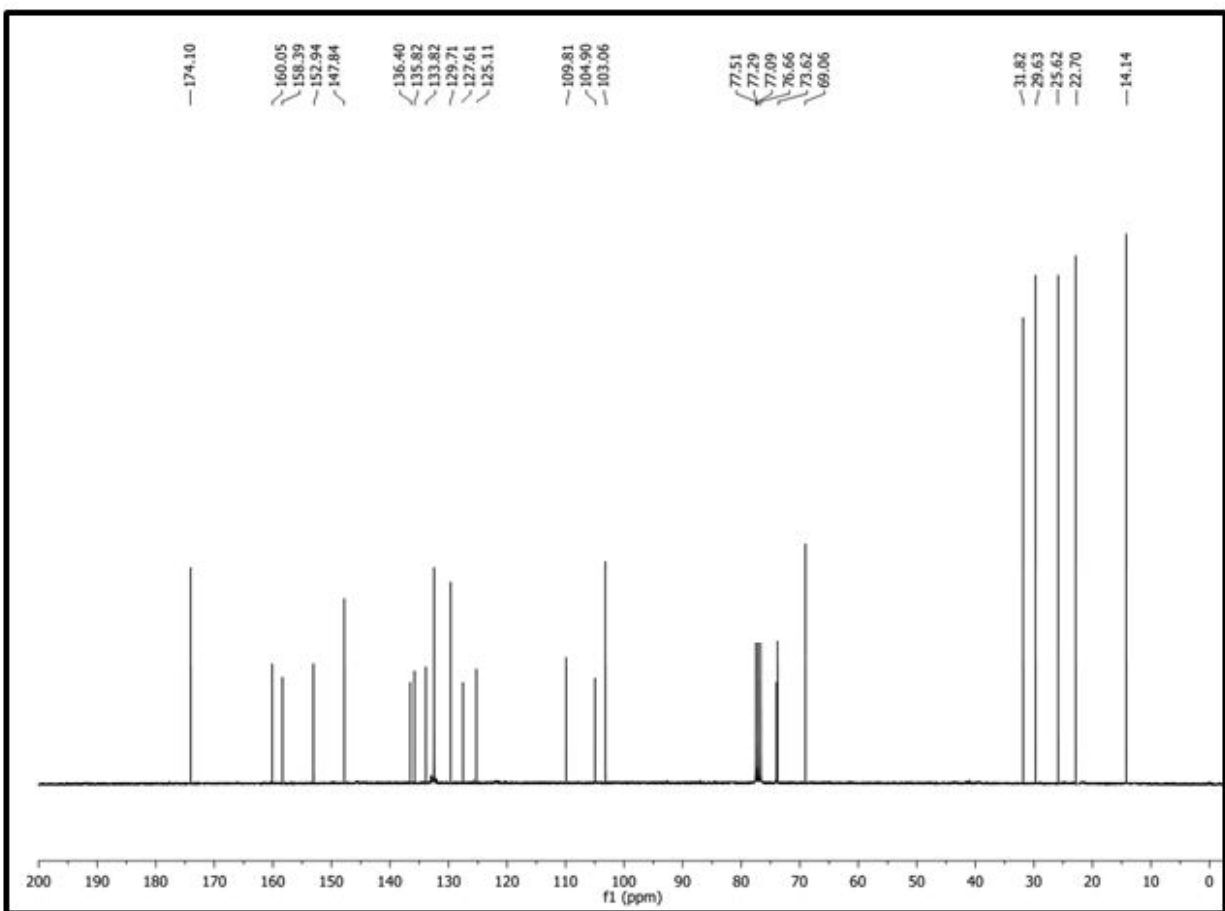

**Figure S25.**  $^{13}\text{C}$  NMR of compound **8b**

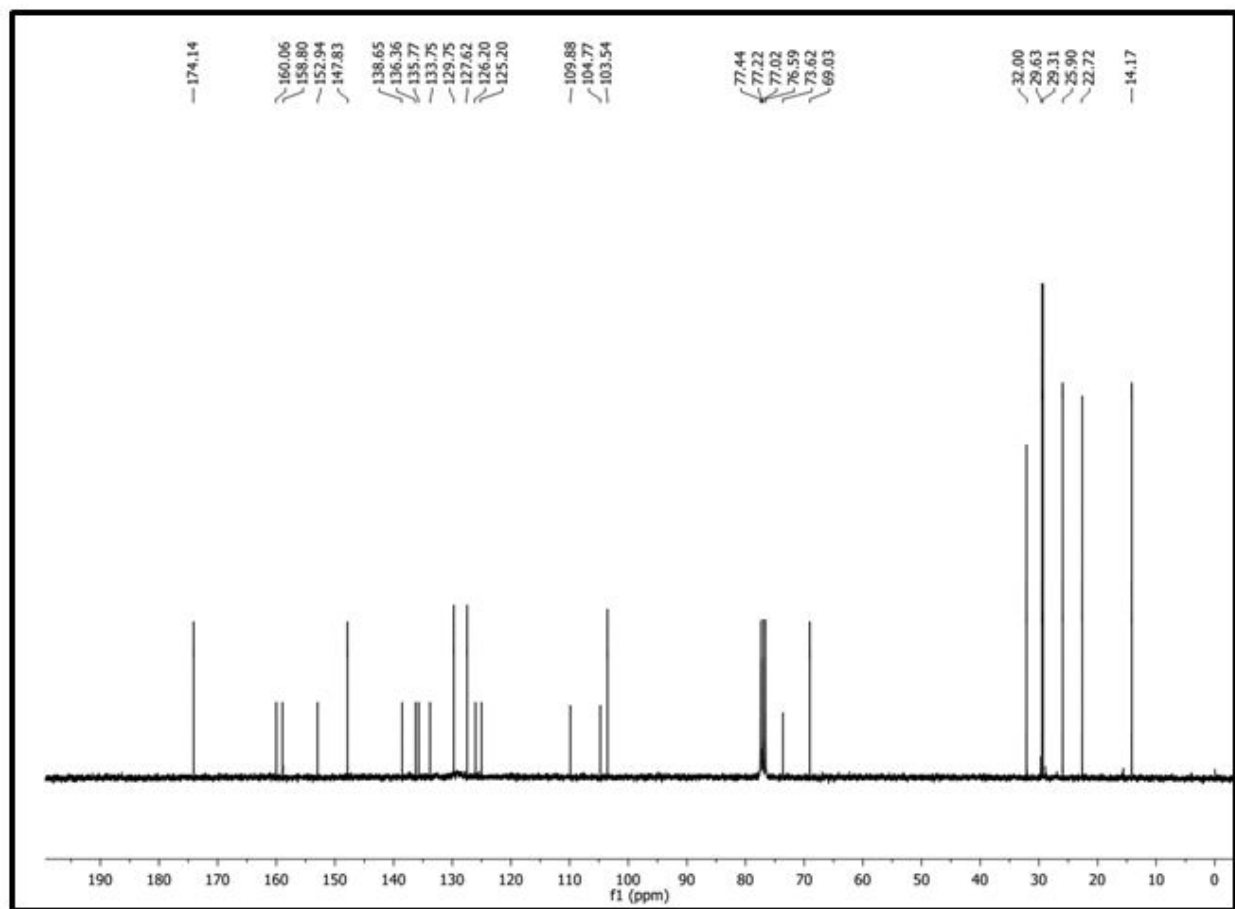

Figure S26.  $^{13}\text{C}$  NMR of compound **8c**

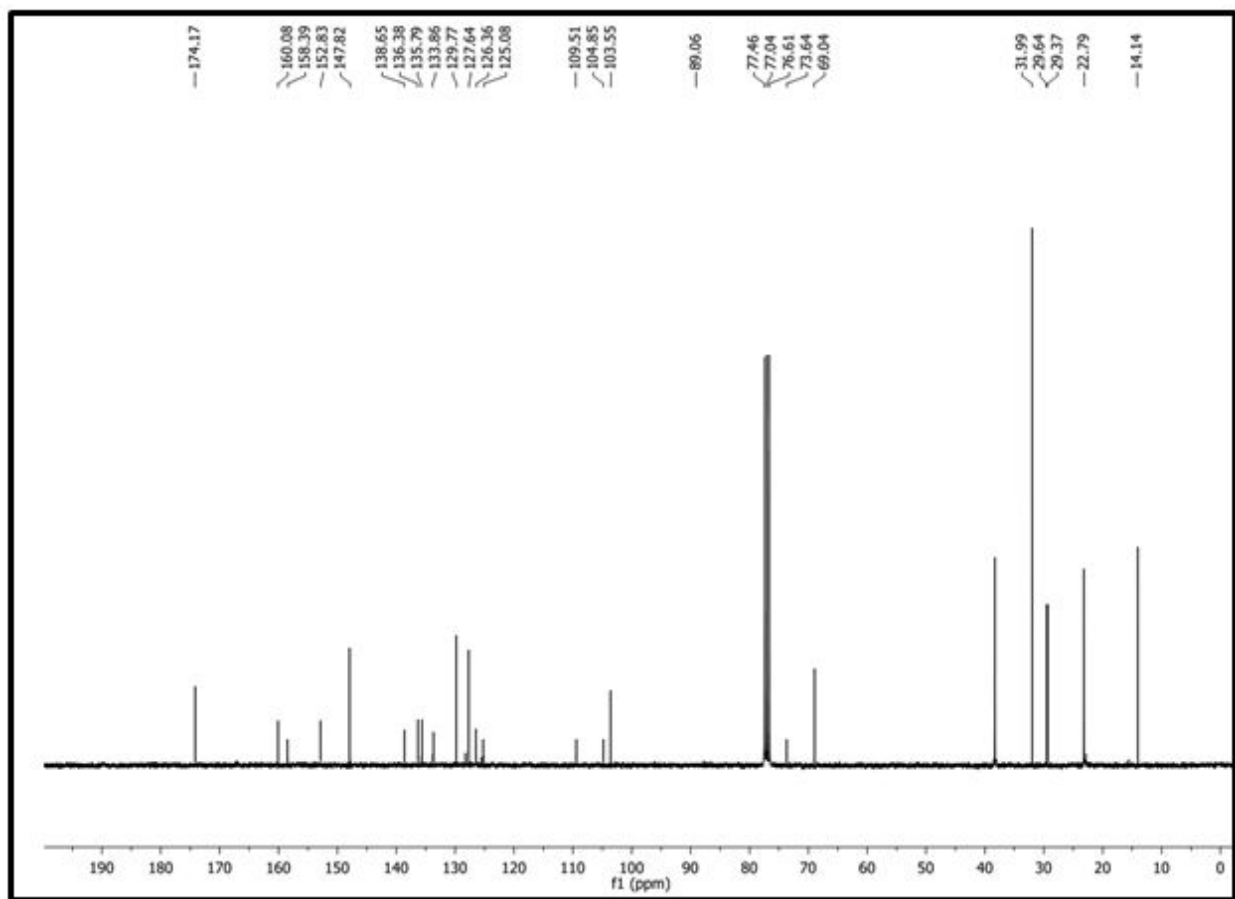

**Figure S27.**  $^{13}\text{C}$  NMR of compound **8d**



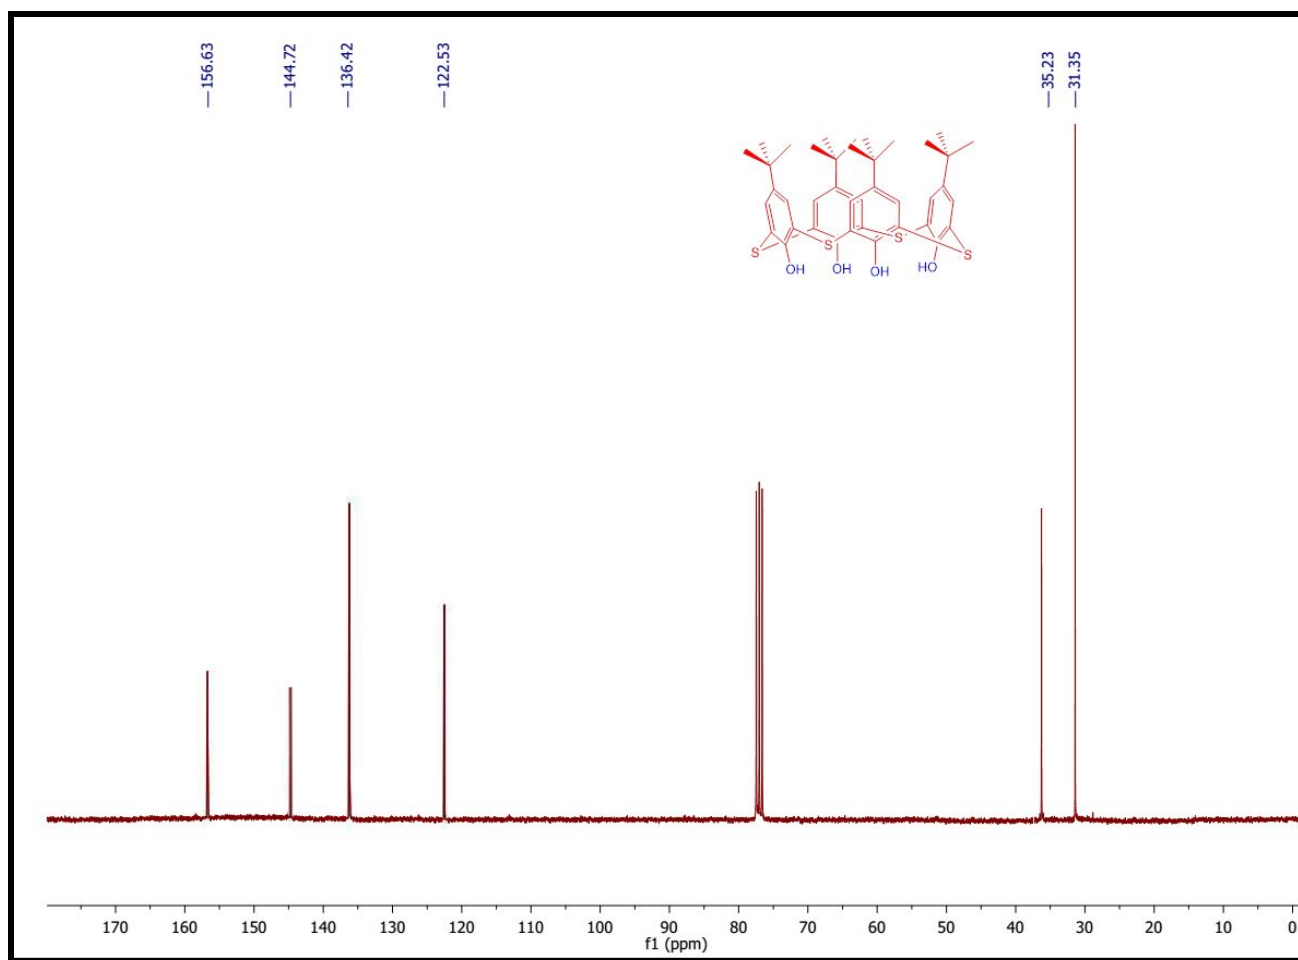

**Figure S28.**  $^{13}\text{C}$  NMR of compound **9**

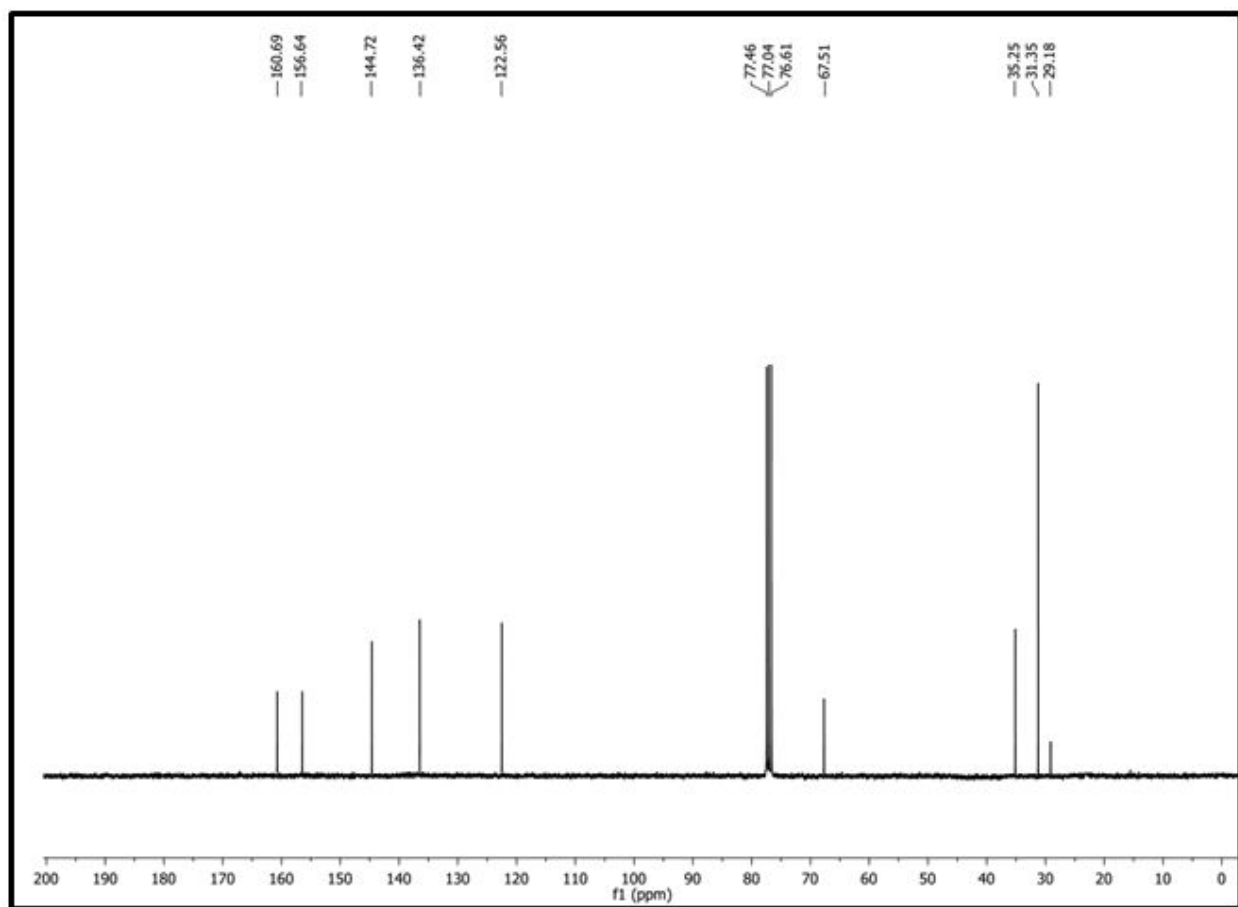

**Figure S29.** <sup>13</sup>C NMR of compound **9a**

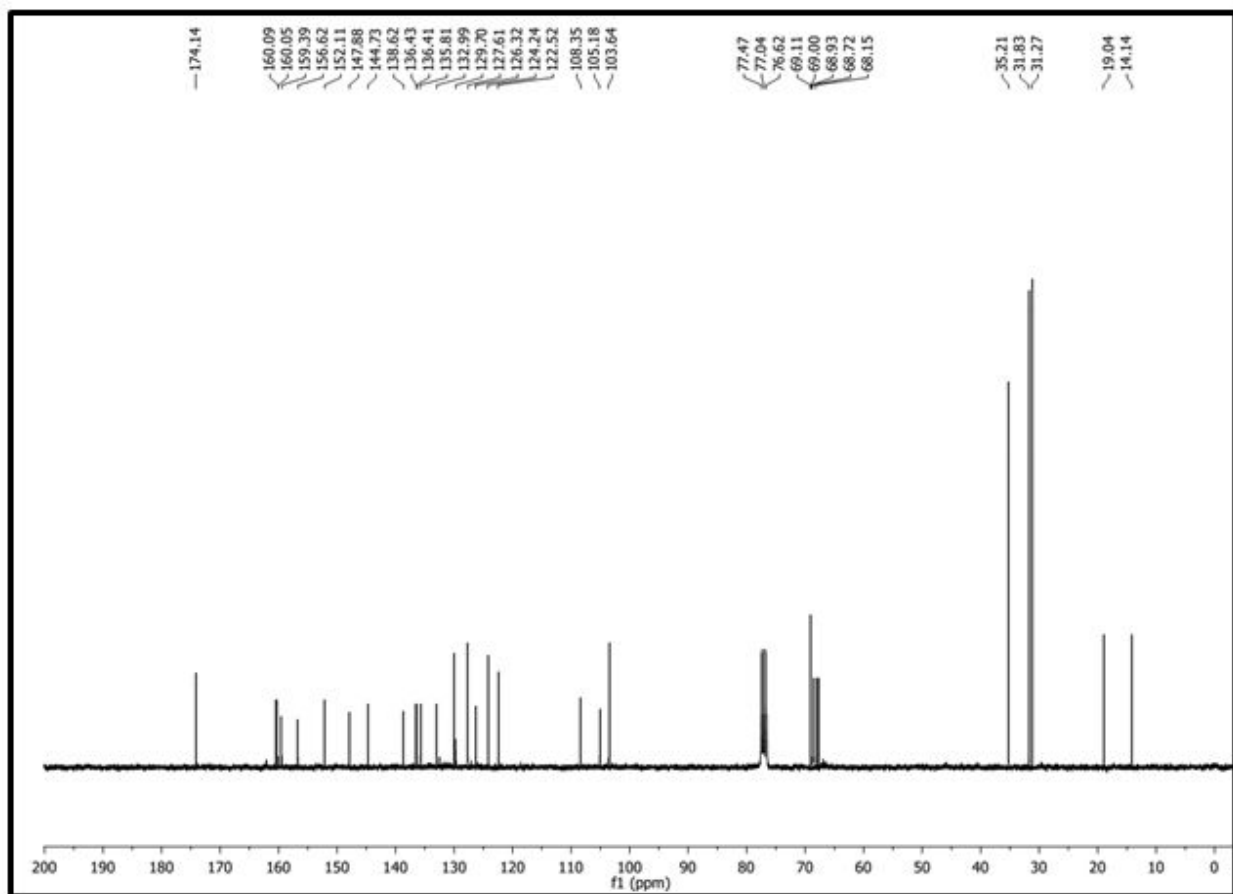

**Figure S30.**  $^{13}\text{C}$  NMR of compound **10a**

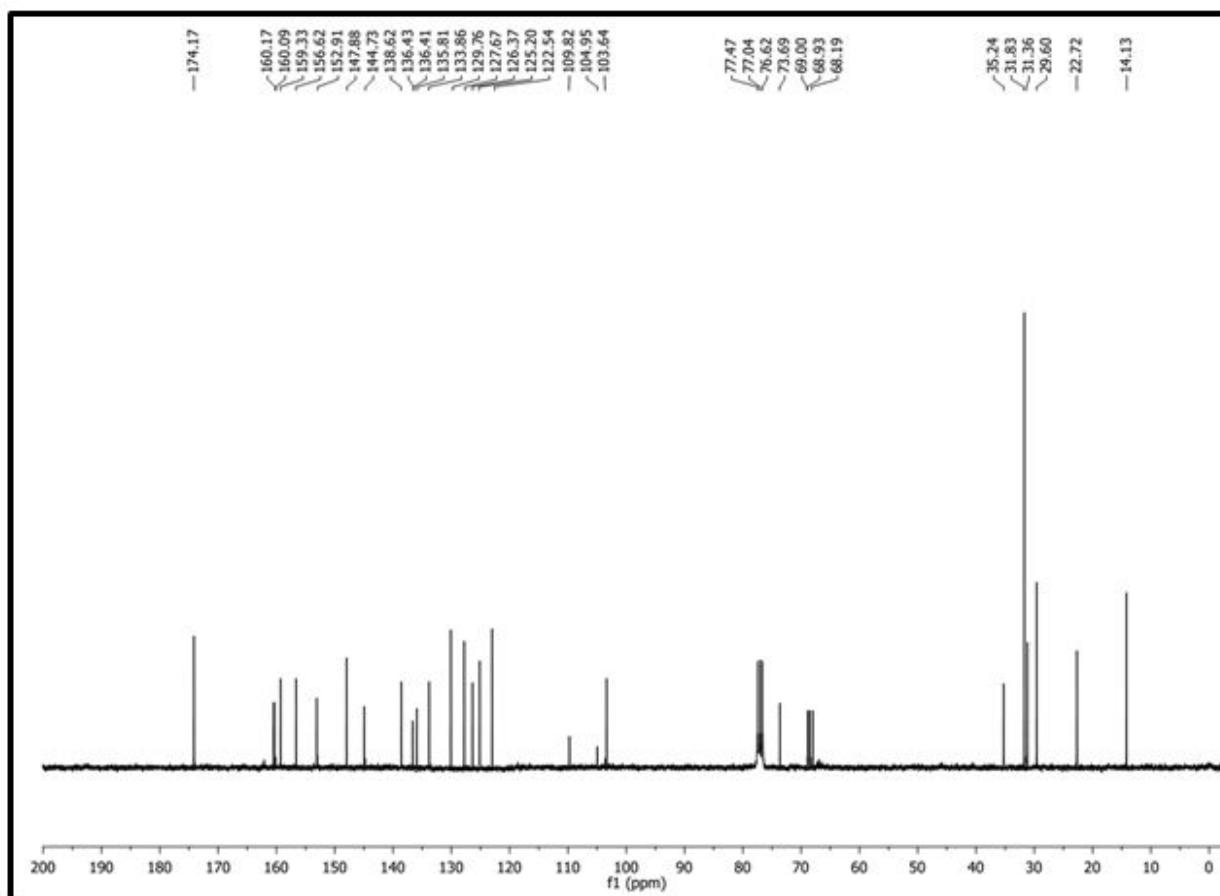

**Figure S31.**  $^{13}\text{C}$  NMR of compound **10b**

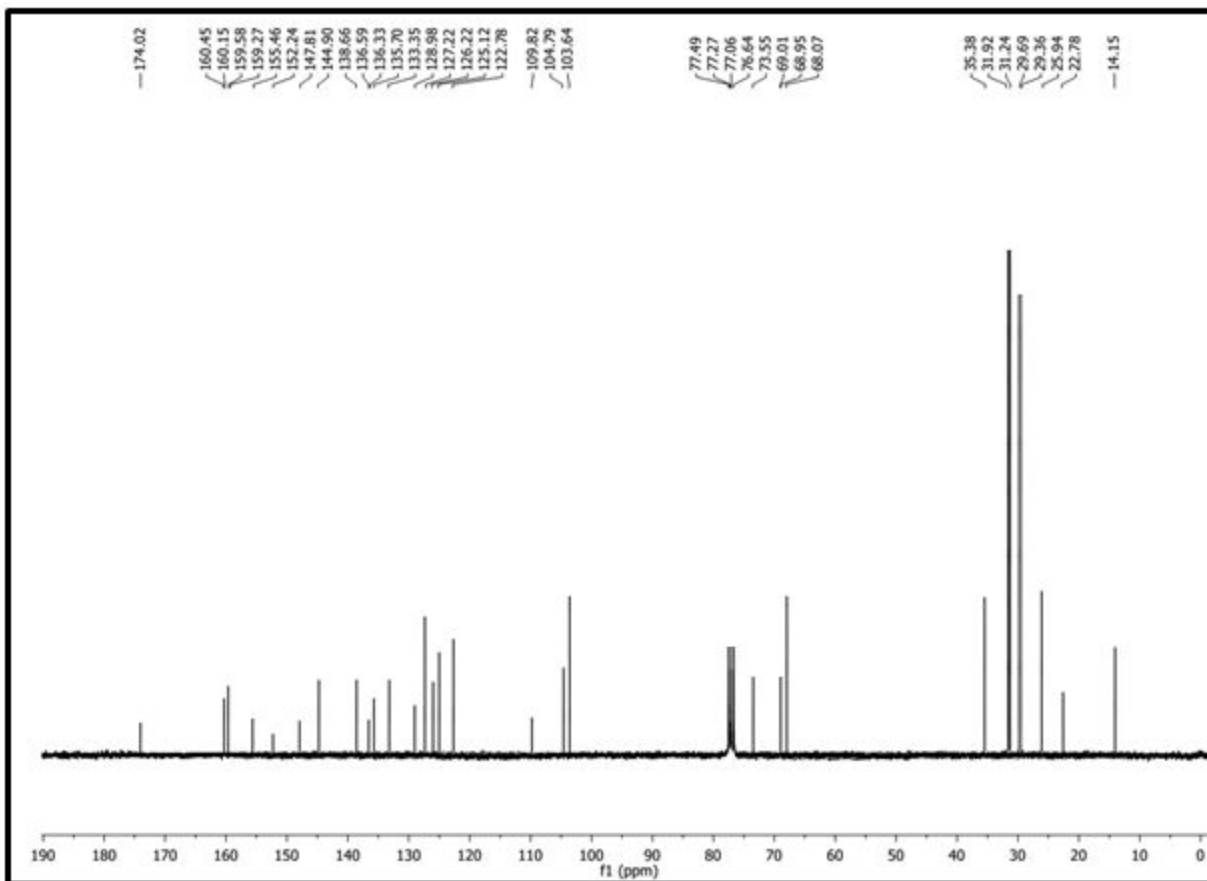

Figure S32.  $^{13}\text{C}$  NMR of compound 10c

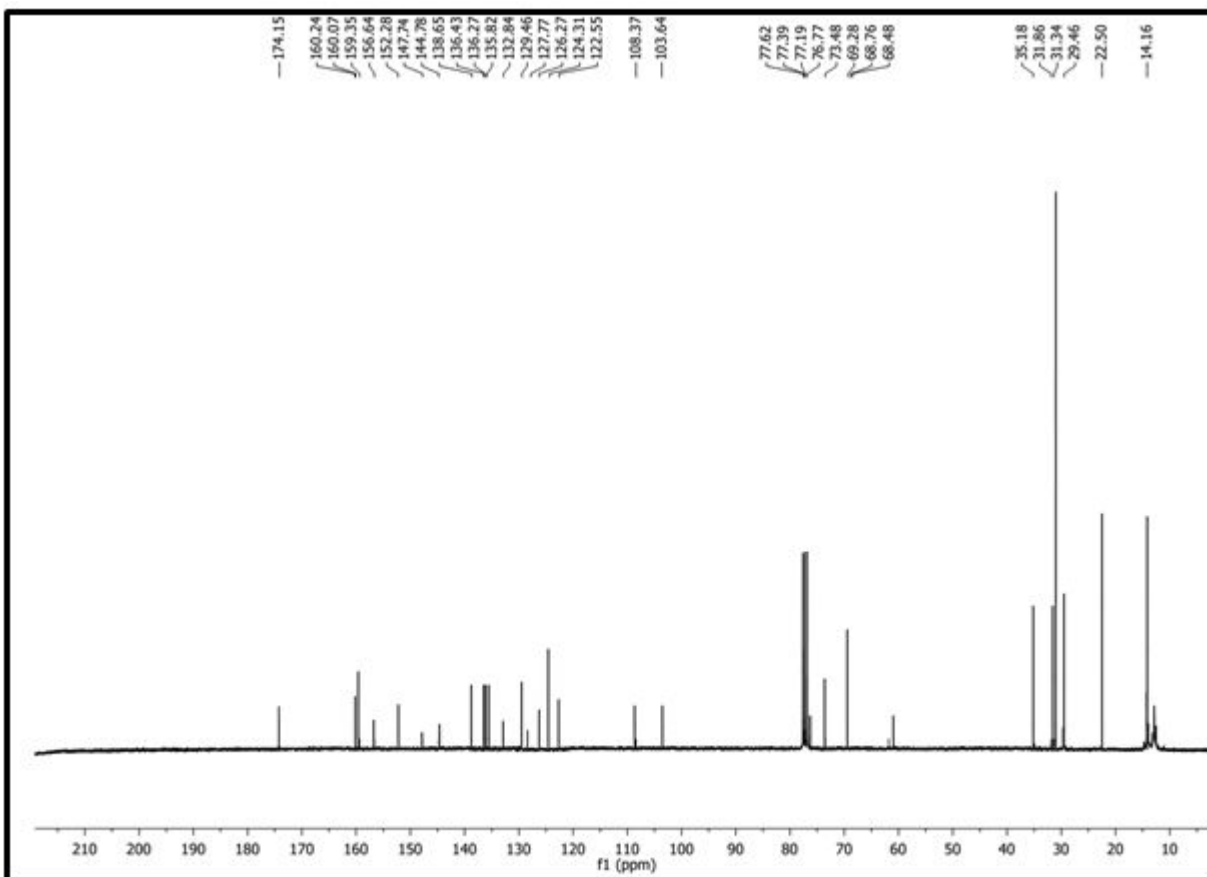

**Figure S33.**  $^{13}\text{C}$  NMR of compound **10d**

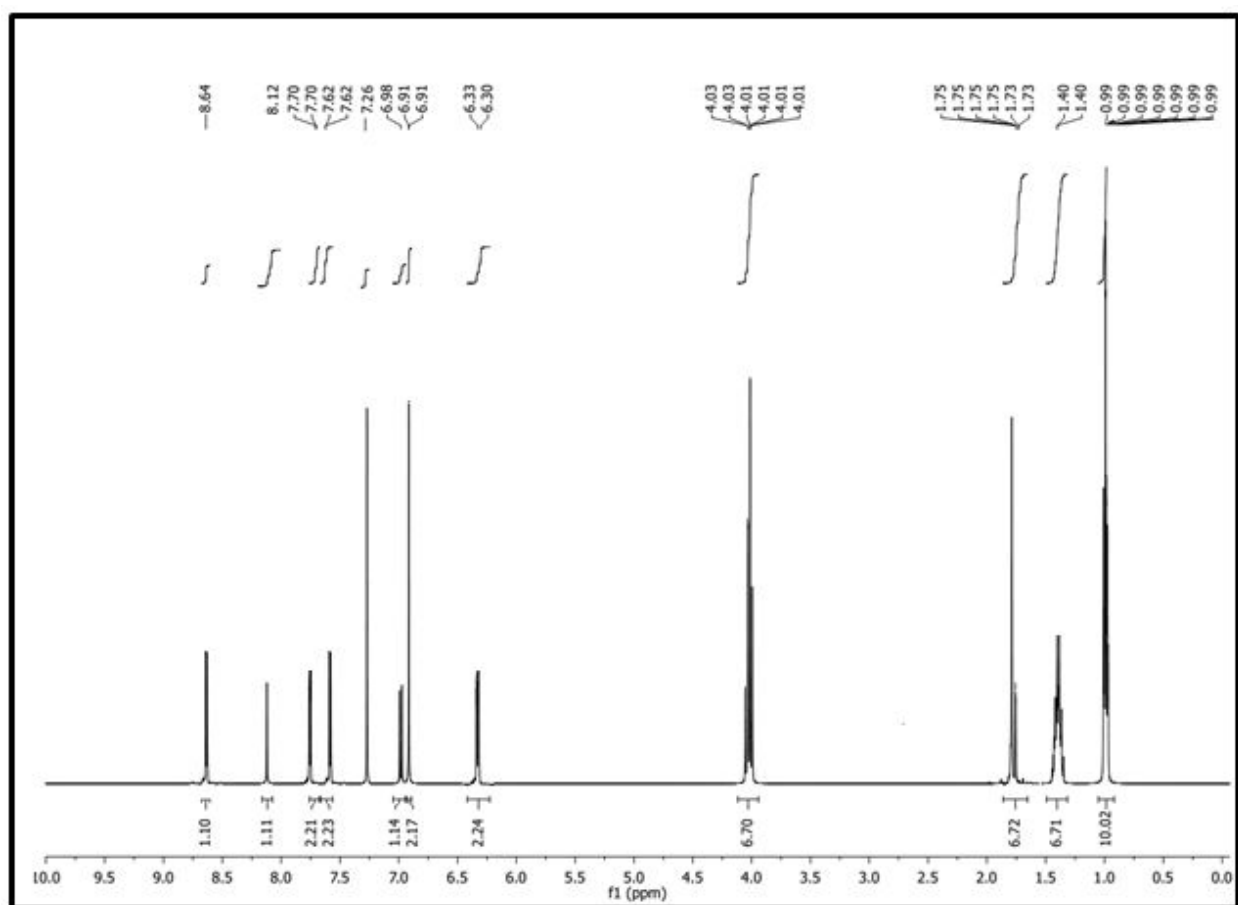

Figure S34.  $^1\text{H}$  NMR of compound **8a**



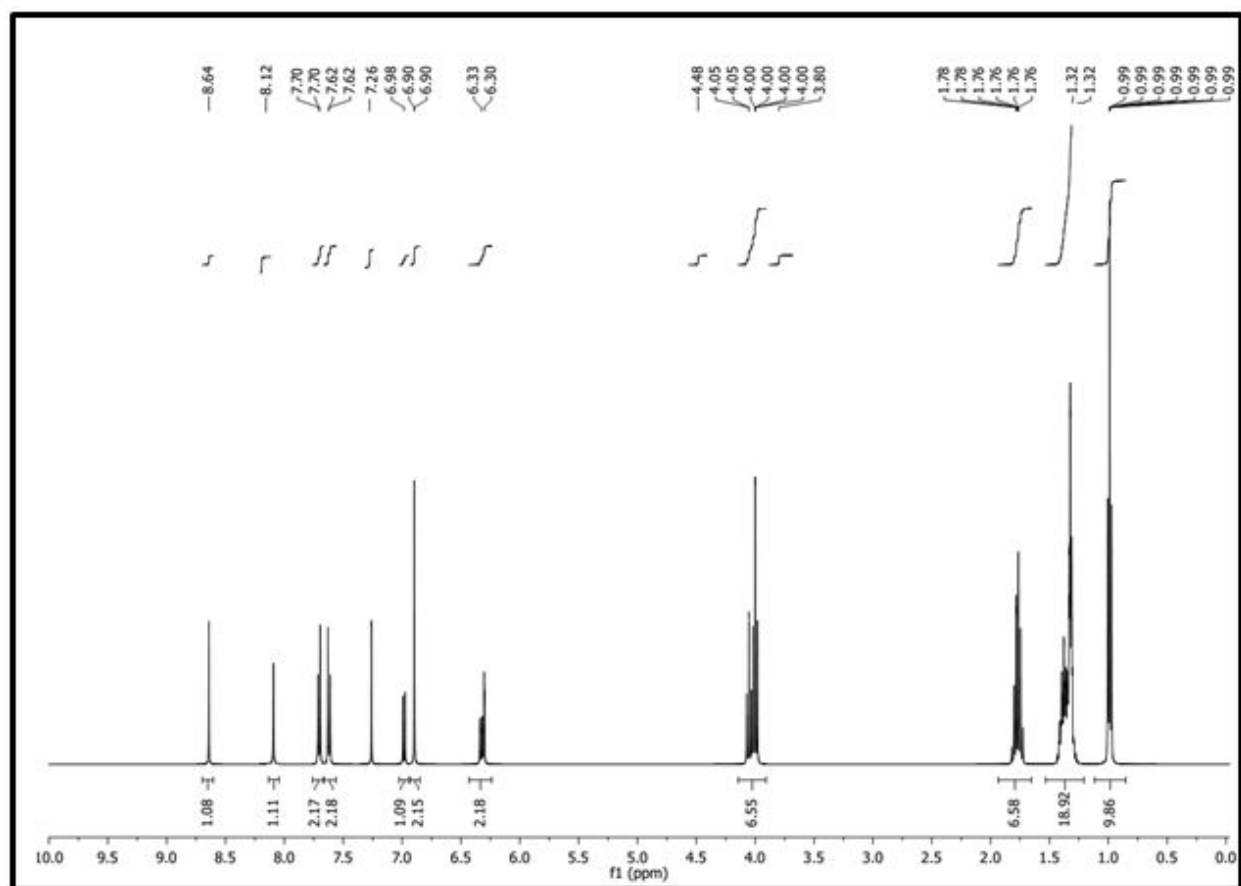

**Figure S35.** <sup>1</sup>H NMR of compound **8b**

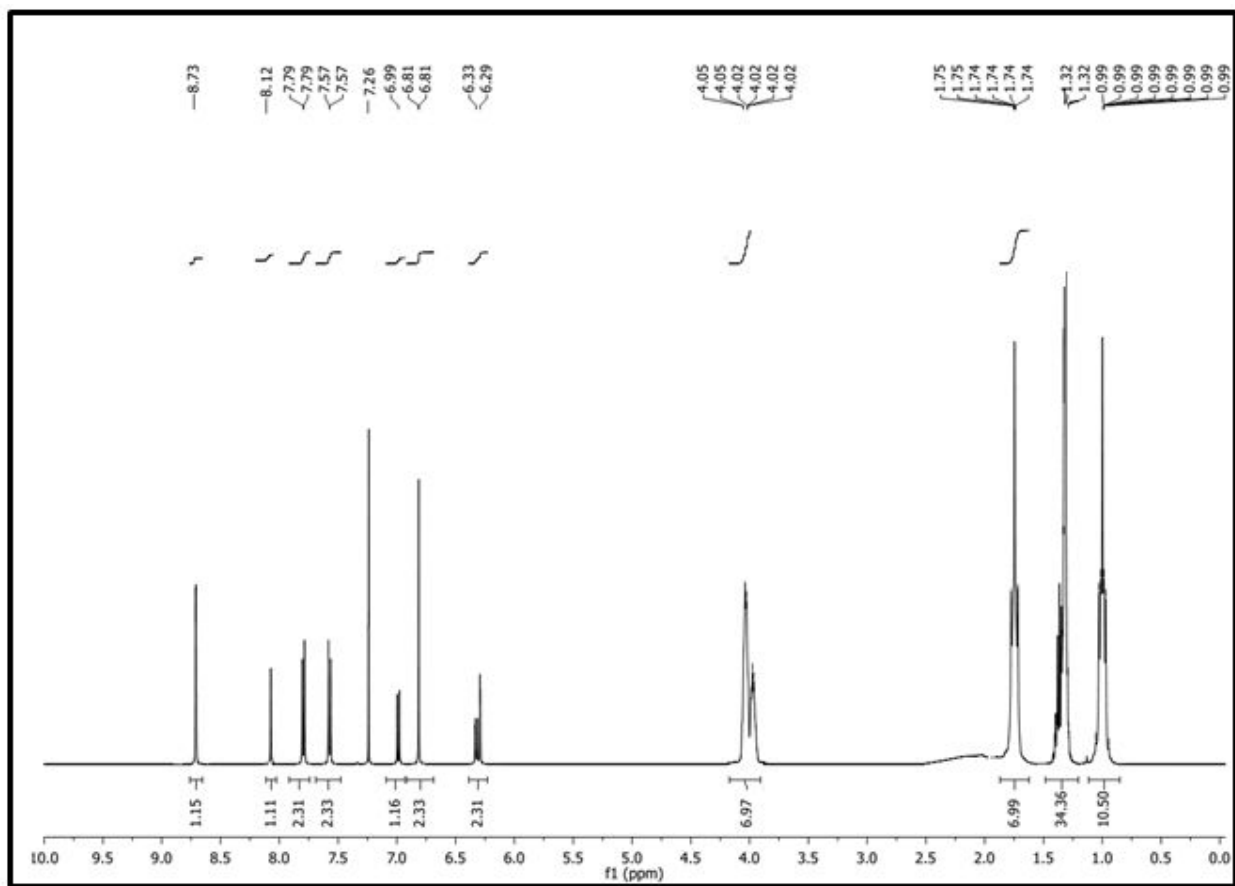

Figure S36. <sup>1</sup>H NMR of compound **8c**

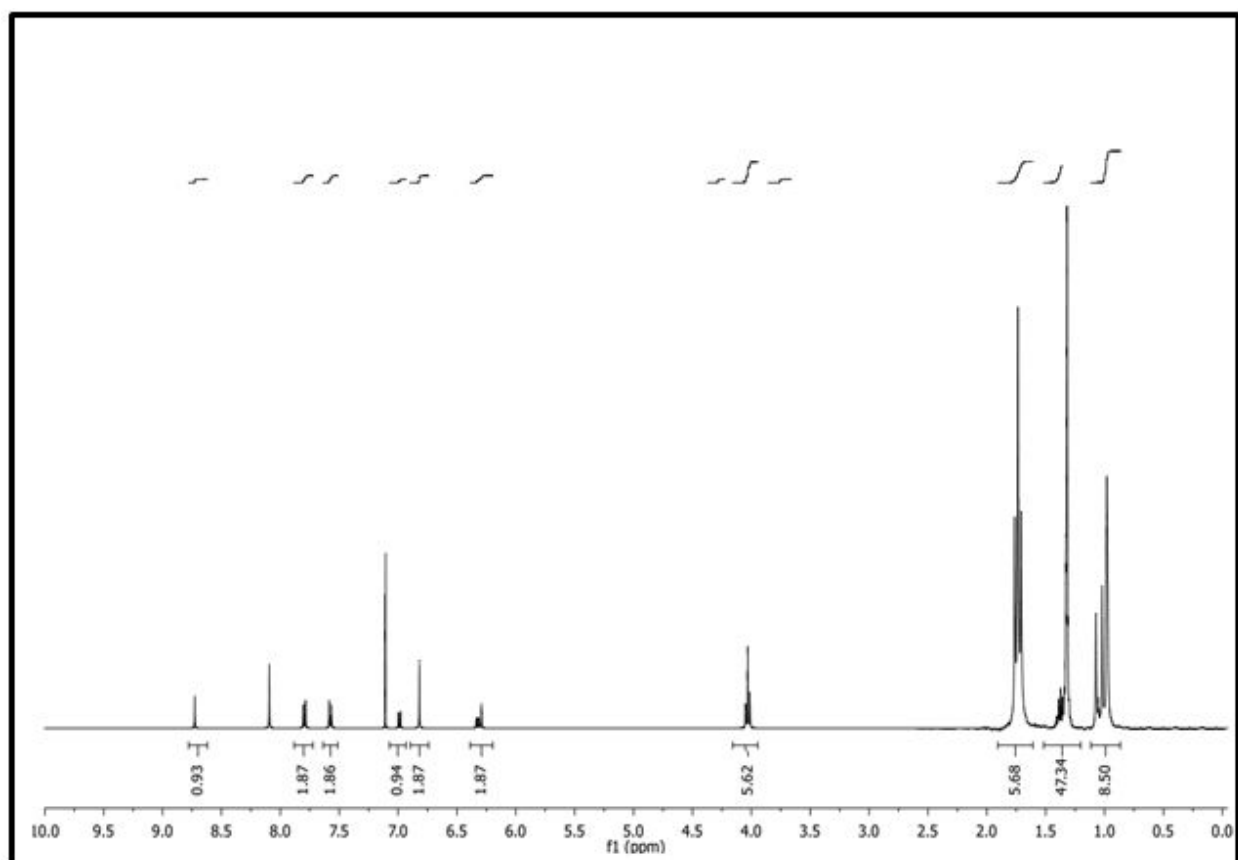

**Figure S37.**  $^1\text{H}$  NMR of compound **8d**

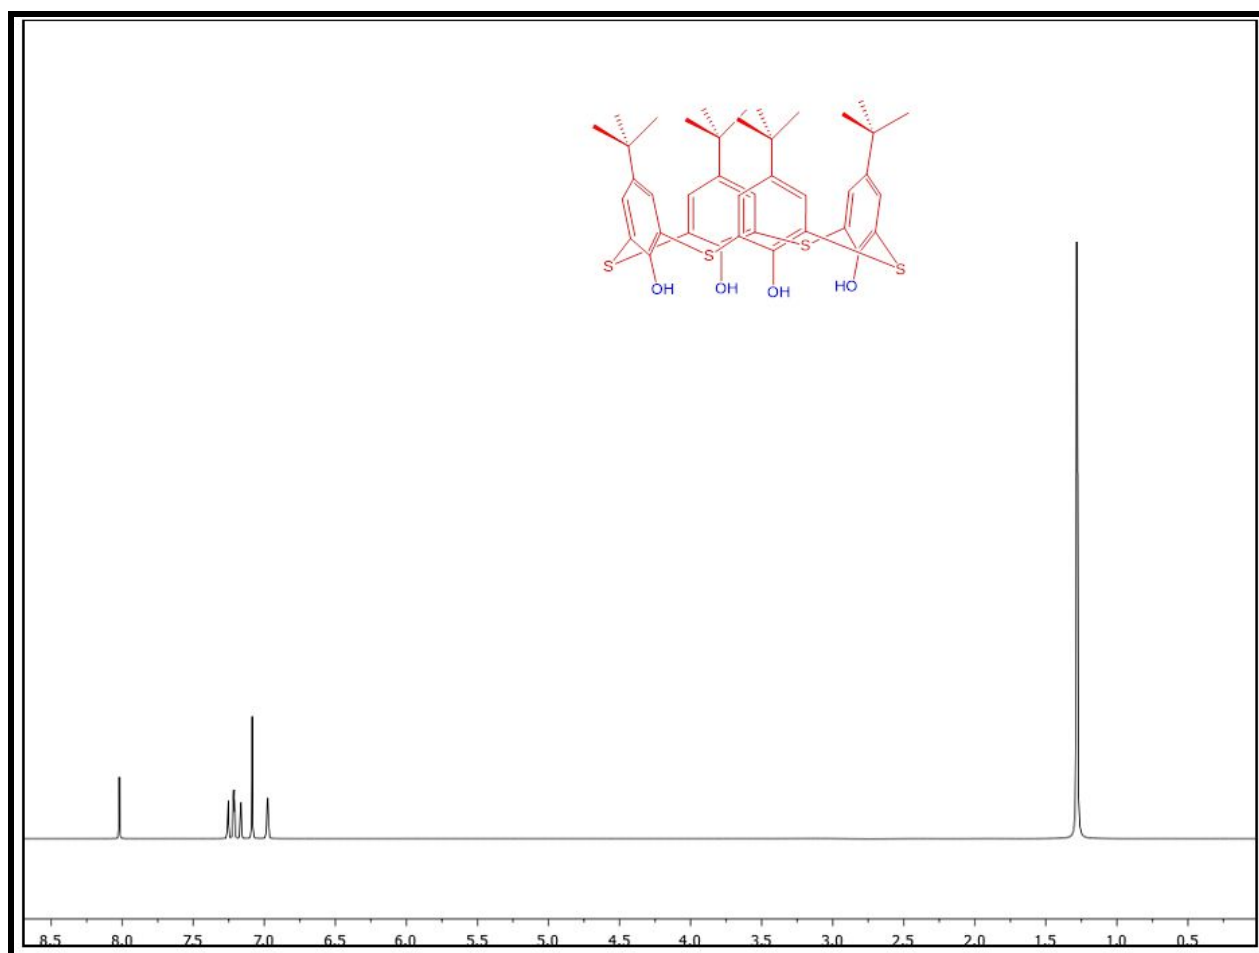

**Figure S38.**  $^1\text{H}$  NMR of compound **9**

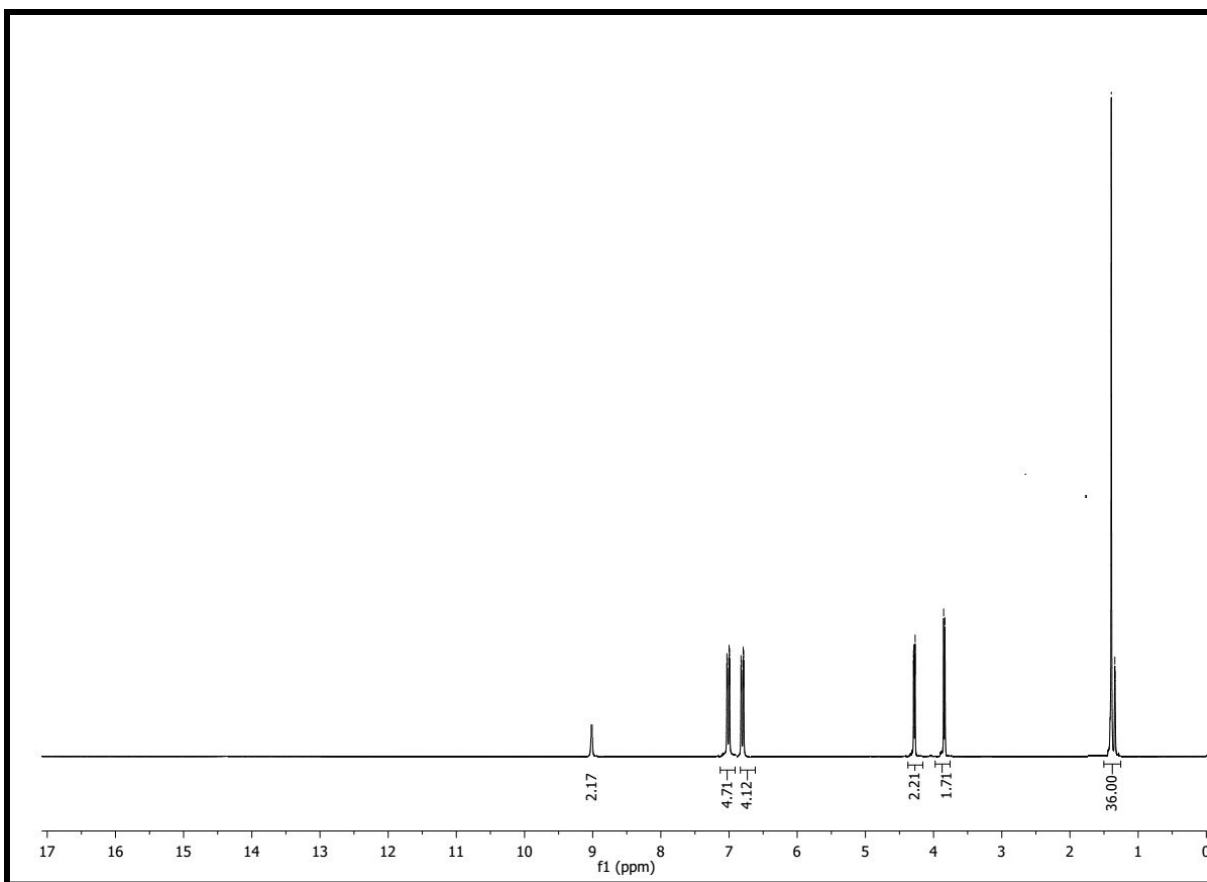

**Figure S39.**  $^1\text{H}$  NMR of compound **9a**

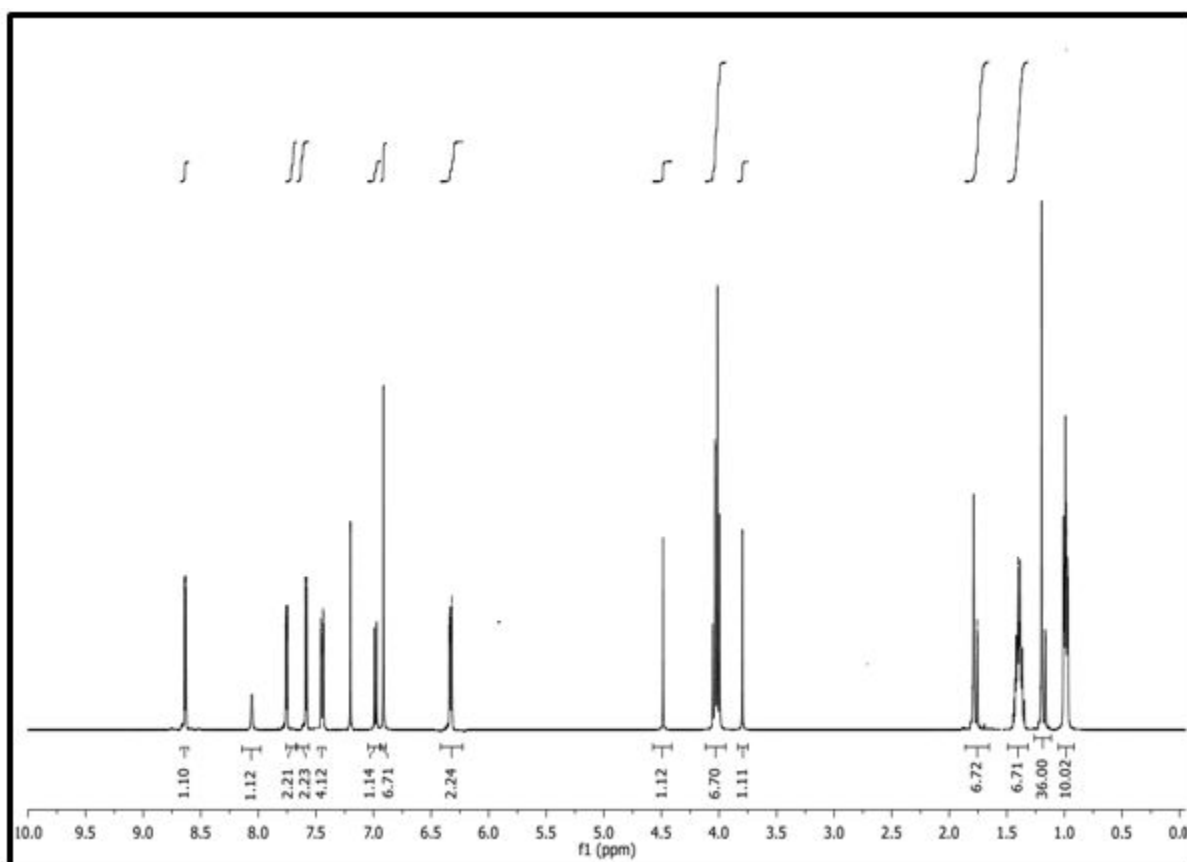

Figure S40.  $^1\text{H}$  NMR of compound 10a

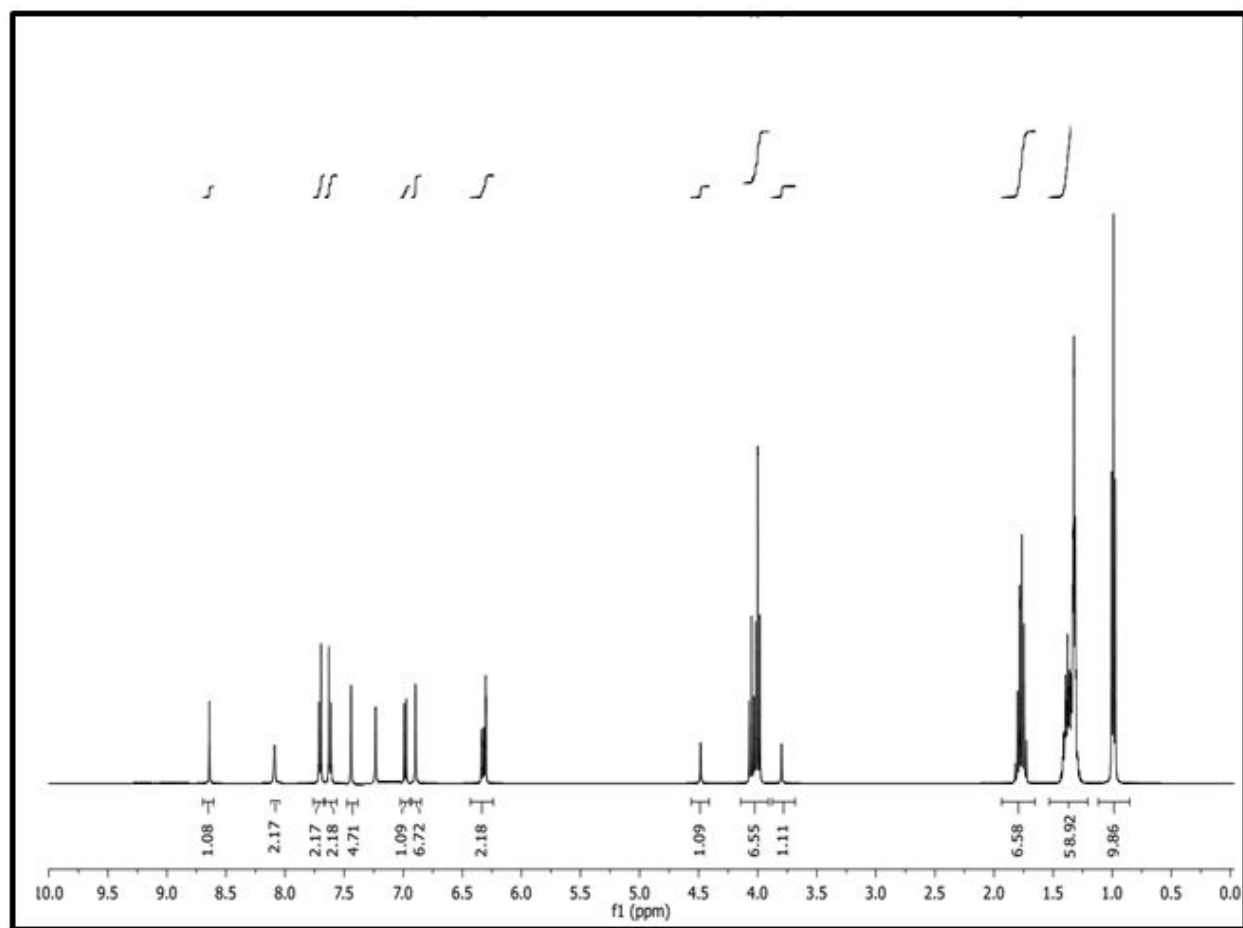

**Figure S41.**  $^1\text{H}$  NMR of compound 10b



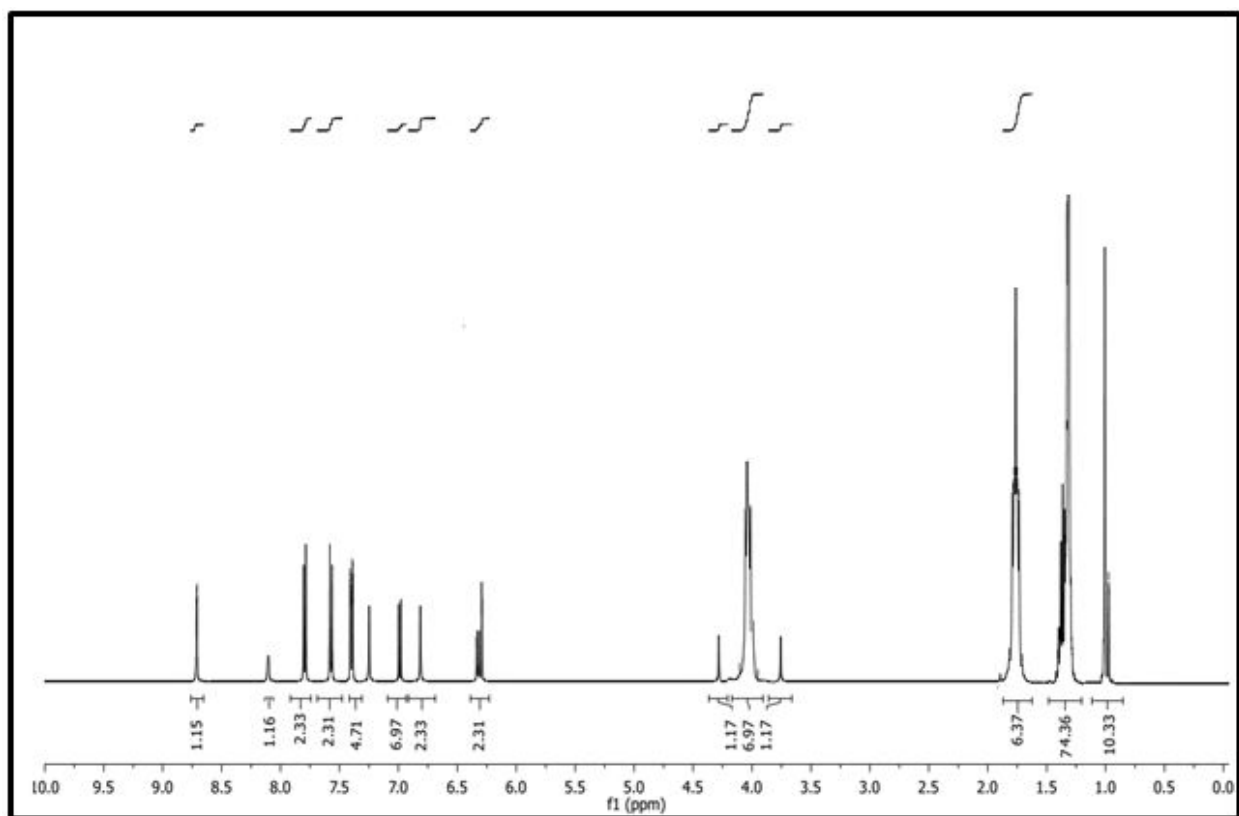

**Figure S42.**  $^1\text{H}$  NMR of compound **10c**

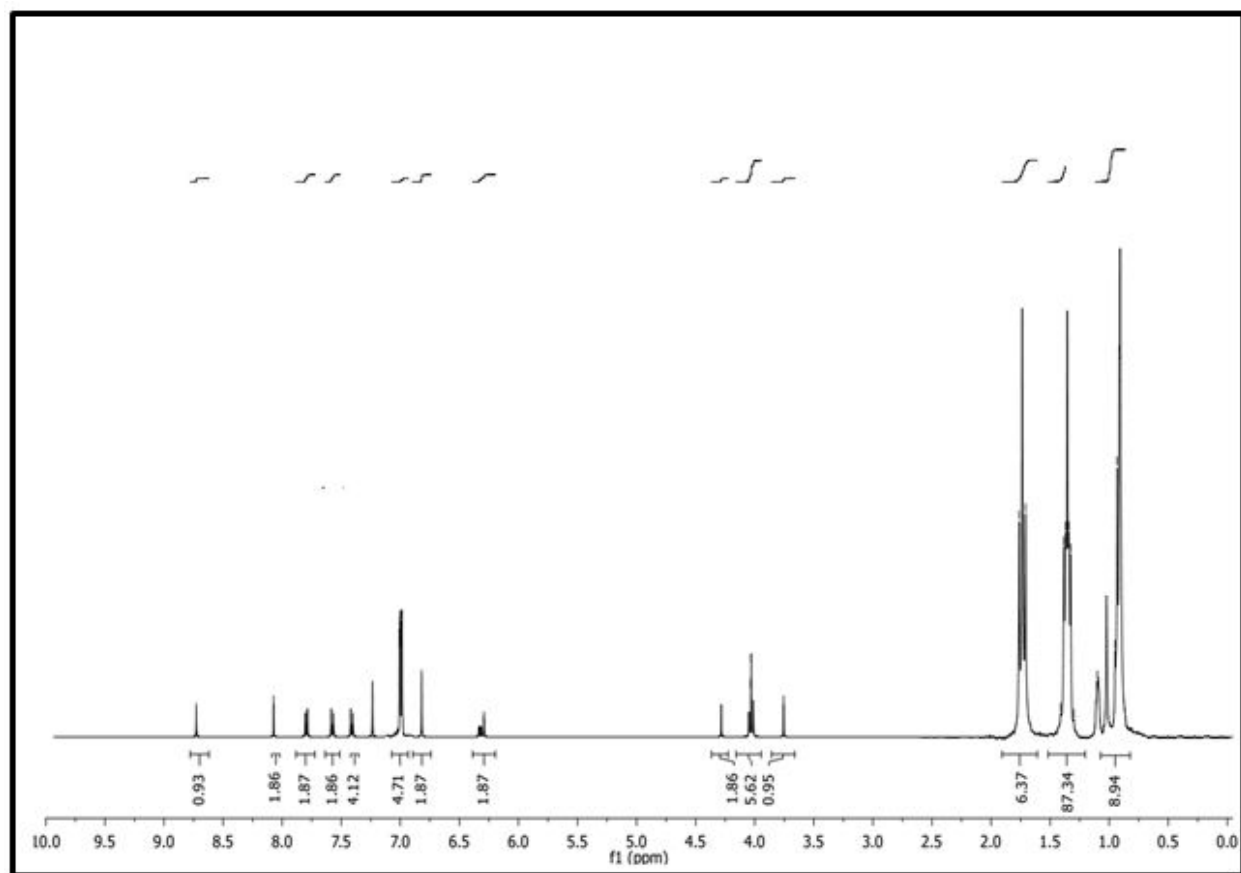

**Figure S43.**  $^1\text{H}$  NMR of compound **10d**

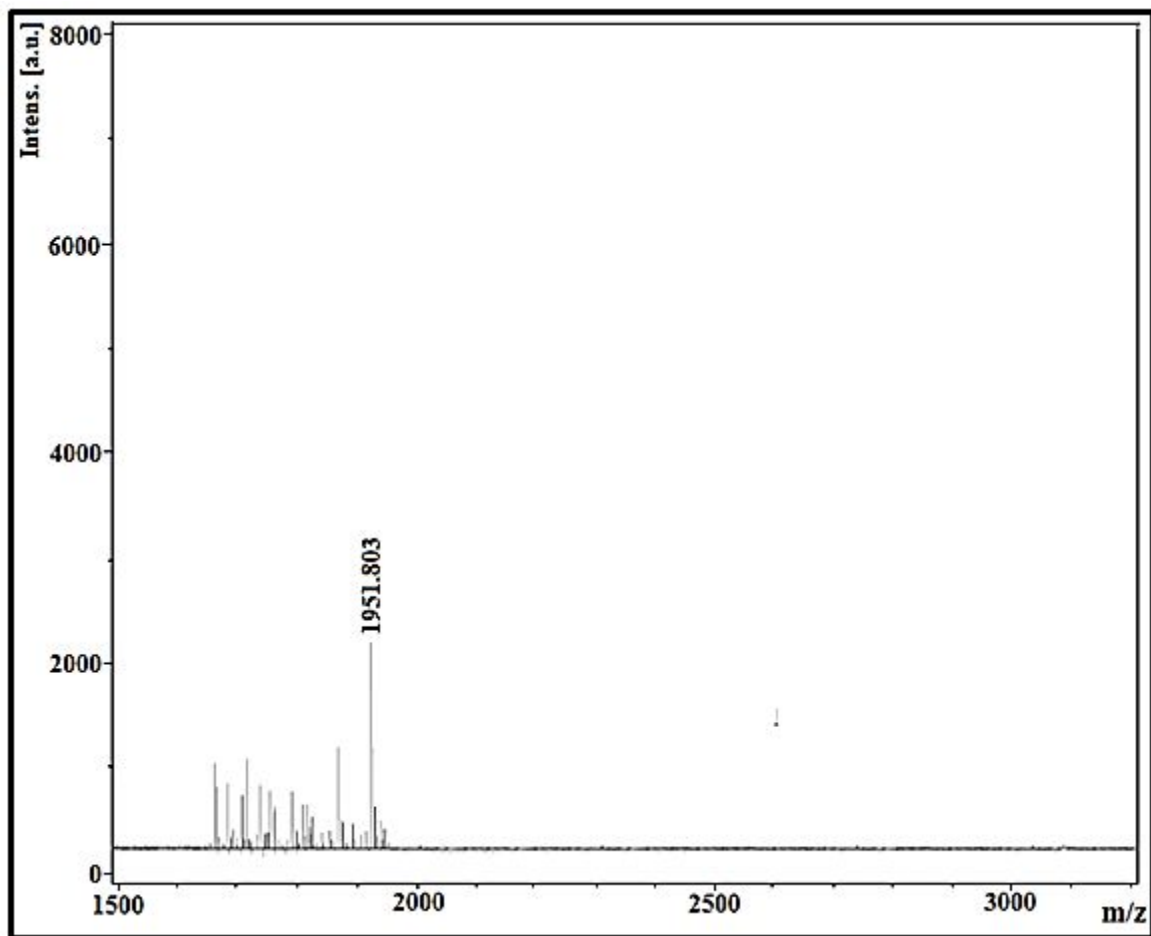

**Figure S44.** MALDI-TOF mass spectra of compound **10a**

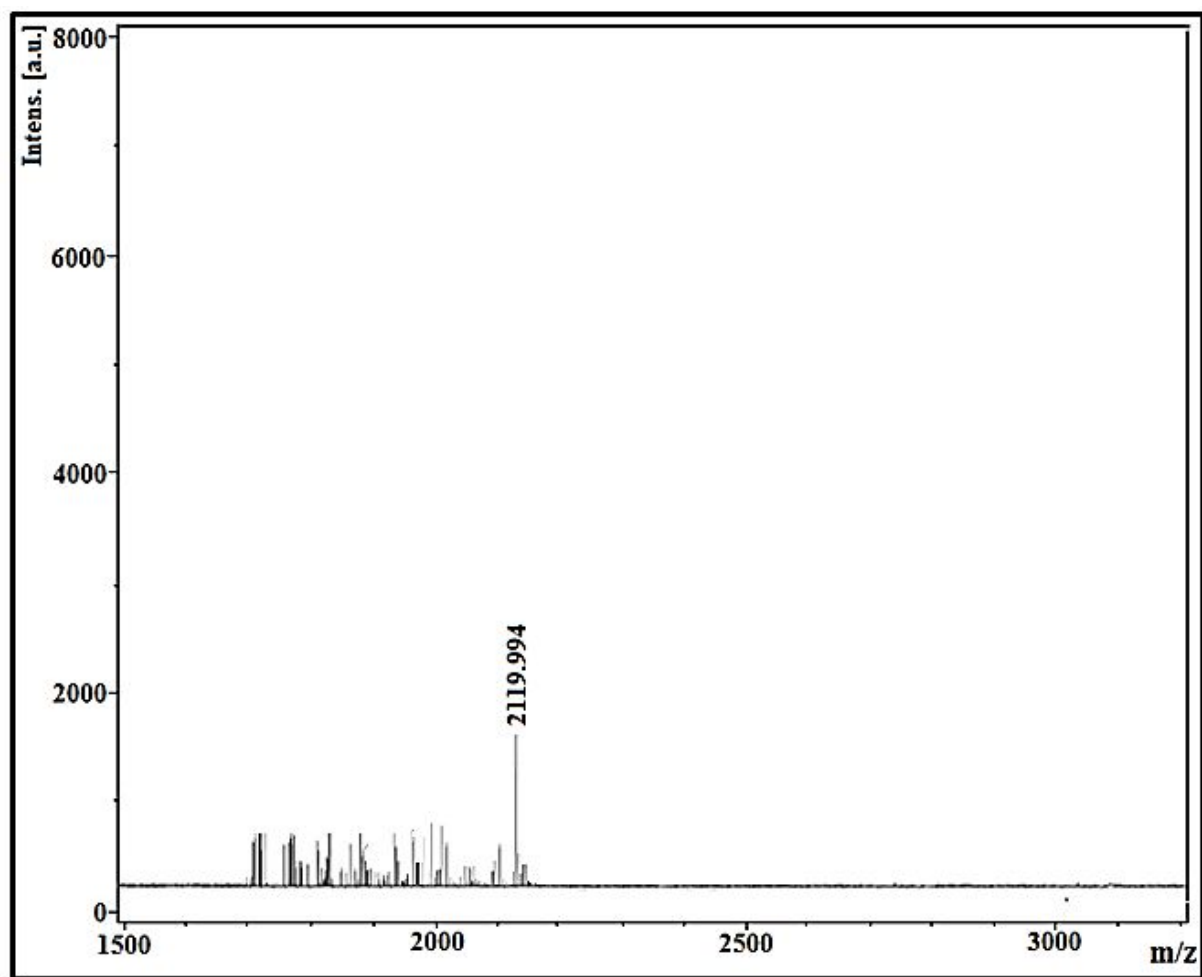

**Figure S45.** MALDI-TOF mass spectra of compound **10b**

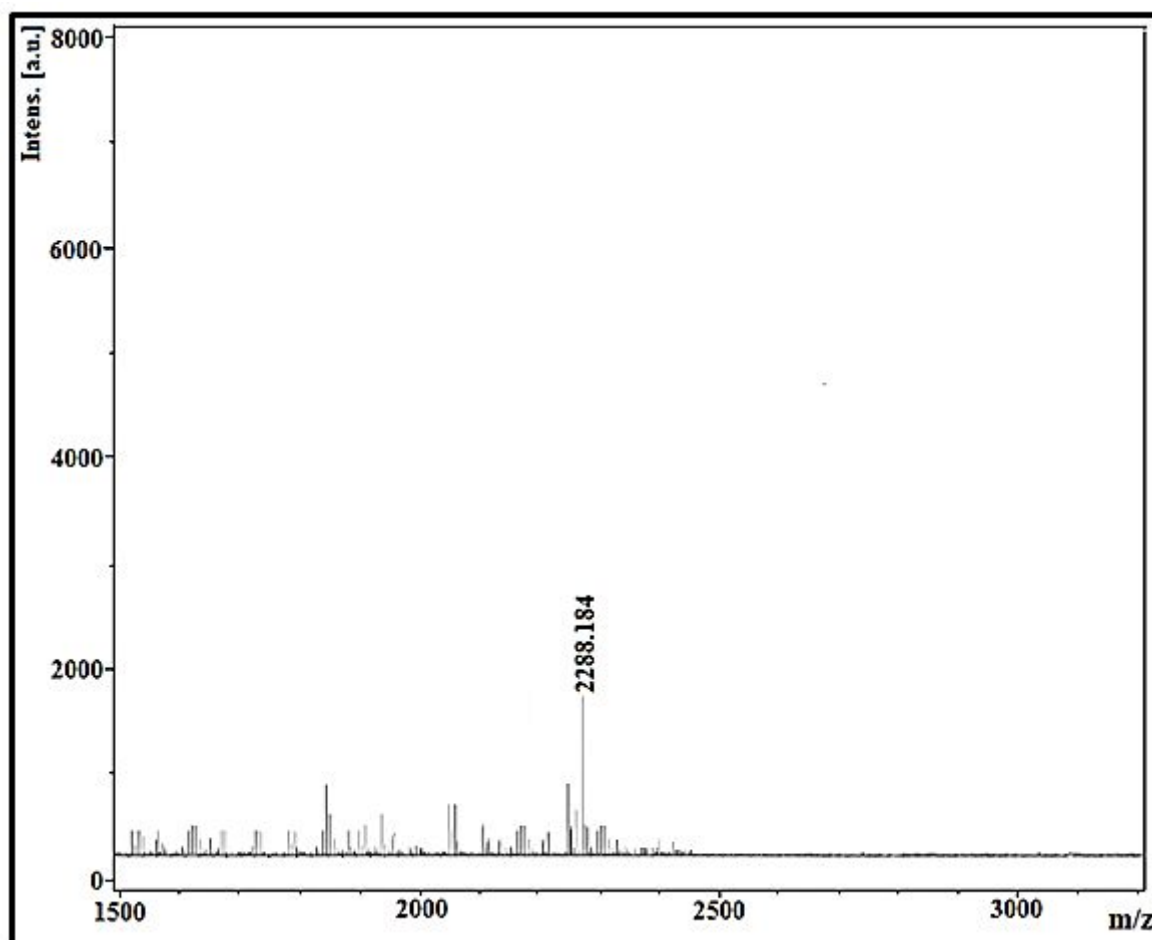

Figure S46. MALDI-TOF mass spectra of compound **10c**

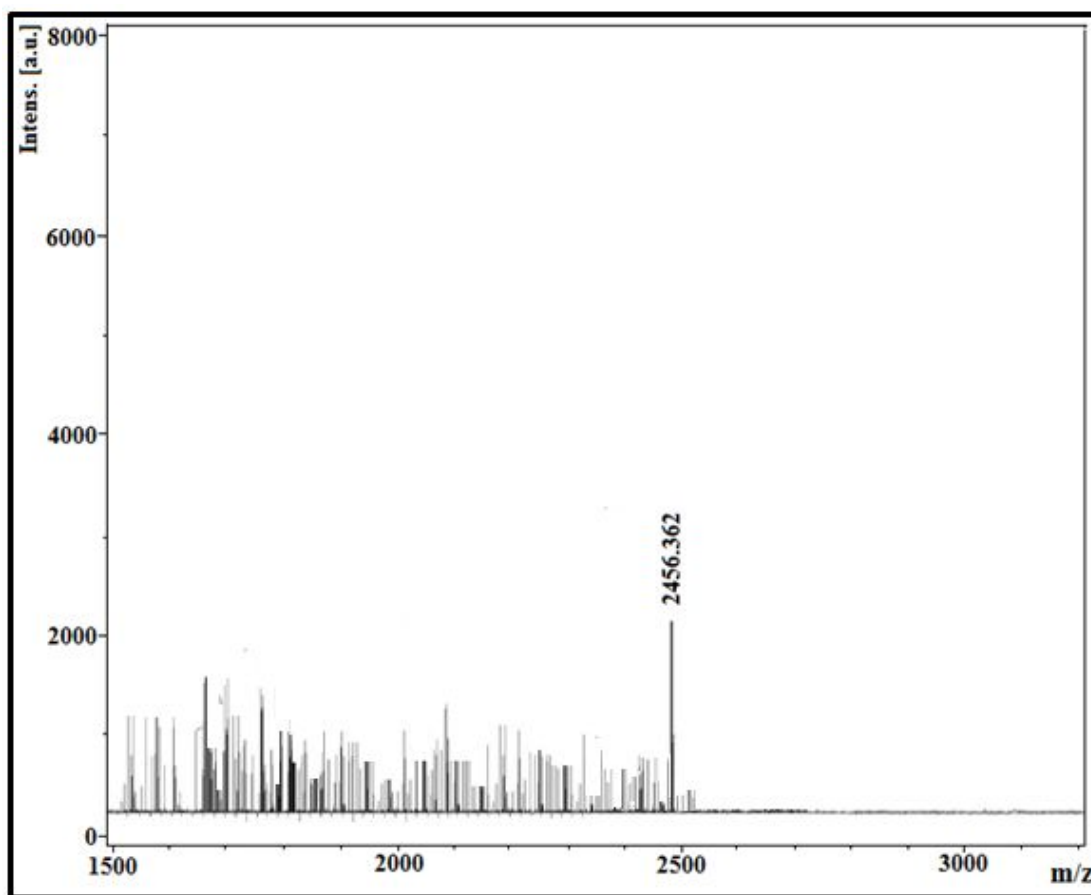

**Figure S47.** MALDI-TOF mass spectra of compound **10d**

## References

1. Pathak, S.K.; Nath, S.; De, J.; Pal, S.K.; Achalkumar, A.S. Contrasting effects of heterocycle substitution and branched tails in the arms of star-shaped molecules. *New J. Chem.* **2017**, *41*, 4680-4688.
2. Tomi, I.H.R.; Al-Heatimi, D.T.A.; Jaffer, H.J. Asymmetric 1,3,4-thiadiazole derivatives: Synthesis, characterization and studying their liquid crystalline properties. *Journal of Molecular Structure.* **2017**, *1141*, 176-185.
3. Sharma, V.S.; Patel, R.B. The effect of position of *tert*-butyl tail group on the formation of liquid crystal in Schiff base ester based homologous series. *Mol.Cryst.Liq.Cryst.* **2017**, *643*, 53-65.
4. Kumagai, H.; Hasegawa, M.; Miyanari, S.; Sugawa, Y.; Sato, Y.; Hori, T.; Ueda, S.; Kamiyama, H.; Miyano, S. Facile Synthesis of p-*tert*-butyl thiacalix[4]arene by the reaction of p-*tert*-butyl phenol with elemental sulphur in the presence of base. *Tetrahedron Letters.* **1997**, *38*, 3971-3972.
5. Sharma, V.S.; Sharma, A.S.; Vekariya, R.H. Columnar self-assembly of bowl-shaped luminescent oxadiazole calix[4]arene derivatives. *Journal of Molecular Liquids.* **2018**, *271*, 319-327.
